# Supplementary material for: Fear in general populations: A cross-sectional study on perceived fear of common diseases, COVID-19, life events, and environmental threats in 30 countries
Source: PubMed Central journal article supplement (PMC11156250; doi:10.7189/jogh.14.05019), 2024-06-07

## ONLINE SUPPLEMENTARY DOCUMENT

**Title:** Fear in general populations: A cross-sectional study on perceived fear of common diseases, COVID-19, life events, and environmental threats in 30 countries

**Authors:** Jiaying Li, Vinciya Pandian, Daniel Yee Tak Fong, Kris Yuet Wan Lok, Janet Yuen Ha Wong, Mandy Man Ho, Edmond Pui Hang Choi, Patricia M Davidson, Wenjie Duan, Marie Tarrant, Jung Jae Lee, Chia-Chin Lin, Oluwadamilare Akingbade, Khalid M Alabdulwahhab, Mohammad Shakil Ahmad, Mohamed Alborai, Meshari A Alzahrani, Anil S Bilimale, Sawitree Boonpatcharanon, Samuel Byiringiro, Muhammad Kamil Che Hasan, Luisa Clausi Schettini, Walter Corzo, Josephine M. De Leon, Anjanette S. De Leon, Hiba Deek, Fabio Efficace, Mayssah A El Nayal, Fathiya El-Raey, Eduardo Ensaldó-Carrasco, Pilar Escotorin, Oluwadamilola Agnes Fadodun, Israel Opeyemi Fawole, Yong-Shian Shawn Goh, Devi Irawan, Naimah Ebrahim Khan, Binu Koirala, Ashish Krishna, Cannas Kwok, Tung Thanh Le, Daniela Giambruno Leal, Miguel Ángel Lezana-Fernández, Emery Manirambona, Leandro Cruz Mantoani, Fernando Meneses-González, Iman Elmahdi Mohamed, Madeleine Mukeshimana, Chinh Thi Minh Nguyen, Huong Thi Thanh Nguyen, Khanh Thi Nguyen, Son Truong Nguyen, Mohd Said Nurumal, Aimable Nzabonimana, Nagla Abdelrahim Mohamed Ahmed Omer, Oluwabunmi Ogungbe, Angela Chiu Yin Poon, Areli Reséndiz-Rodríguez, Busayasachee Puang-Ngern, Ceryl G Sagun, Riyaz Ahmed Shaik, Nikhil Gauri Shankar, Kathrin Sommer, Edgardo Toro, Hanh Thi Hong Tran, Elvira L Urgel, Emmanuel Uwiringiyimana, Tita Vanichbuncha, Naglaa Youssef

### Supplementary material summary

| Contents                                                                                                                                                                 | Numbered pages |
|--------------------------------------------------------------------------------------------------------------------------------------------------------------------------|----------------|
| eTable 1. World Health Organization (WHO) regions, economic development levels and COVID-19 severity levels of the 30 countries or regions                               | 2              |
| eTable 2. Demographic summary by country                                                                                                                                 | 3-10           |
| eTable 3. Weighted demographic summary by country                                                                                                                        | 11-18          |
| eTable 4. Description of respondents' weighted fear of 11 factors by country.                                                                                            | 19-20          |
| eFigure 1. Visualization of the weighted fear of 11 factors by country, World Health Organization (WHO) region, economic development level, and COVID-19 severity level. | 21-29          |

**eTable 1. World Health Organization (WHO) regions, economic development levels and COVID-19 severity levels of the 30 countries or regions.**

| <b>Country</b>          | <b>Region</b>                | <b>Economic development level</b> | <b>COVID-19 severity level</b> |
|-------------------------|------------------------------|-----------------------------------|--------------------------------|
| Australia               | Western Pacific Region       | High-income                       | Low severity                   |
| Brazil                  | Region of Americas           | Upper-middle-income               | Medium severity                |
| Burundi                 | African Region               | Low-income                        | Low severity                   |
| Canada                  | Region of Americas           | High-income                       | High severity                  |
| Chile                   | Region of Americas           | High-income                       | High severity                  |
| Egypt                   | Eastern Mediterranean Region | Lower-middle-income               | Low severity                   |
| Guatemala               | Region of Americas           | Upper-middle-income               | Medium severity                |
| Hong Kong               | Western Pacific Region       | High-income                       | Low severity                   |
| India                   | South-East Asian Region      | Lower-middle-income               | Medium severity                |
| Indonesia               | South-East Asian Region      | Lower-middle-income               | Medium severity                |
| Italy                   | European Region              | High-income                       | High severity                  |
| Lebanon                 | Eastern Mediterranean Region | Upper-middle-income               | High severity                  |
| Libya                   | Eastern Mediterranean Region | Upper-middle-income               | High severity                  |
| Macau                   | Western Pacific Region       | High-income                       | Low severity                   |
| Mainland China          | Western Pacific Region       | Upper-middle-income               | Low severity                   |
| Malaysia                | Western Pacific Region       | Upper-middle-income               | Medium severity                |
| Mexico                  | Region of Americas           | Upper-middle-income               | High severity                  |
| Nigeria                 | African Region               | Lower-middle-income               | Low severity                   |
| Philippines             | Western Pacific Region       | Lower-middle-income               | Medium severity                |
| Republic of Sudan       | Eastern Mediterranean Region | Low-income                        | Medium severity                |
| Rwanda                  | African Region               | Low-income                        | Medium severity                |
| Saudi Arabia            | Eastern Mediterranean Region | High-income                       | Medium severity                |
| Singapore               | Western Pacific Region       | High-income                       | Medium severity                |
| South African Regionica | African Region               | Upper-middle-income               | High severity                  |
| South Korea             | Western Pacific Region       | High-income                       | Low severity                   |
| Spain                   | European Region              | High-income                       | High severity                  |
| Thailand                | South-East Asian Region      | Upper-middle-income               | Low severity                   |
| United Kingdom          | European Region              | High-income                       | High severity                  |
| United States           | Region of Americas           | High-income                       | High severity                  |
| Vietnam                 | Western Pacific Region       | Lower-middle-income               | Low severity                   |

**eTable 2. Demographic summary by country.**

| Characteristic                  | Australia, N = 639 <sup>1</sup> | Brazil, N = 553 <sup>1</sup> | Burundi, N = 369 <sup>1</sup> | Canada, N = 368 <sup>1</sup> | Chile, N = 342 <sup>1</sup> | Egypt, N = 461 <sup>1</sup> | Guatemala, N = 229 <sup>1</sup> | Hong Kong, N = 2,127 <sup>1</sup> | India, N = 529 <sup>1</sup> | Indonesia, N = 482 <sup>1</sup> | Italy, N = 203 <sup>1</sup> | Lebanon, N = 440 <sup>1</sup> | Libya, N = 645 <sup>1</sup> | Macau, N = 250 <sup>1</sup> | Mainland China, N = 667 <sup>1</sup> |
|---------------------------------|---------------------------------|------------------------------|-------------------------------|------------------------------|-----------------------------|-----------------------------|---------------------------------|-----------------------------------|-----------------------------|---------------------------------|-----------------------------|-------------------------------|-----------------------------|-----------------------------|--------------------------------------|
| <b>Age</b>                      |                                 |                              |                               |                              |                             |                             |                                 |                                   |                             |                                 |                             |                               |                             |                             |                                      |
| 18-24                           | 106 (17%)                       | 128 (23%)                    | 41 (11%)                      | 20 (5.4%)                    | 75 (22%)                    | 103 (22%)                   | 88 (38%)                        | 196 (9.2%)                        | 151 (29%)                   | 433 (90%)                       | 4 (2.0%)                    | 210 (48%)                     | 246 (38%)                   | 70 (28%)                    | 477 (72%)                            |
| 25-29                           | 84 (13%)                        | 95 (17%)                     | 44 (12%)                      | 35 (9.5%)                    | 45 (13%)                    | 71 (15%)                    | 43 (19%)                        | 239 (11%)                         | 98 (19%)                    | 23 (4.8%)                       | 12 (5.9%)                   | 44 (10%)                      | 138 (21%)                   | 31 (12%)                    | 94 (14%)                             |
| 30-34                           | 32 (5.0%)                       | 73 (13%)                     | 70 (19%)                      | 48 (13%)                     | 32 (9.4%)                   | 85 (18%)                    | 27 (12%)                        | 315 (15%)                         | 53 (10%)                    | 11 (2.3%)                       | 14 (6.9%)                   | 53 (12%)                      | 92 (14%)                    | 43 (17%)                    | 29 (4.3%)                            |
| 35-39                           | 49 (7.7%)                       | 95 (17%)                     | 77 (21%)                      | 52 (14%)                     | 40 (12%)                    | 87 (19%)                    | 22 (9.6%)                       | 328 (15%)                         | 94 (18%)                    | 6 (1.2%)                        | 16 (7.9%)                   | 51 (12%)                      | 70 (11%)                    | 41 (16%)                    | 15 (2.2%)                            |
| 40-44                           | 45 (7.0%)                       | 41 (7.4%)                    | 70 (19%)                      | 33 (9.0%)                    | 44 (13%)                    | 52 (11%)                    | 12 (5.2%)                       | 240 (11%)                         | 40 (7.6%)                   | 2 (0.4%)                        | 25 (12%)                    | 29 (6.6%)                     | 40 (6.2%)                   | 27 (11%)                    | 15 (2.2%)                            |
| 45-49                           | 80 (13%)                        | 26 (4.7%)                    | 32 (8.7%)                     | 14 (3.8%)                    | 43 (13%)                    | 27 (5.9%)                   | 18 (7.9%)                       | 253 (12%)                         | 31 (5.9%)                   | 2 (0.4%)                        | 29 (14%)                    | 16 (3.6%)                     | 22 (3.4%)                   | 13 (5.2%)                   | 25 (3.7%)                            |
| 50-54                           | 64 (10%)                        | 28 (5.1%)                    | 16 (4.3%)                     | 26 (7.1%)                    | 33 (9.6%)                   | 22 (4.8%)                   | 7 (3.1%)                        | 165 (7.8%)                        | 11 (2.1%)                   | 3 (0.6%)                        | 19 (9.4%)                   | 16 (3.6%)                     | 22 (3.4%)                   | 11 (4.4%)                   | 8 (1.2%)                             |
| 55-59                           | 69 (11%)                        | 25 (4.5%)                    | 9 (2.4%)                      | 35 (9.5%)                    | 12 (3.5%)                   | 8 (1.7%)                    | 6 (2.6%)                        | 117 (5.5%)                        | 17 (3.2%)                   | 2 (0.4%)                        | 36 (18%)                    | 13 (3.0%)                     | 10 (1.6%)                   | 5 (2.0%)                    | 4 (0.6%)                             |
| 60-64                           | 14 (2.2%)                       | 25 (4.5%)                    | 5 (1.4%)                      | 49 (13%)                     | 8 (2.3%)                    | 4 (0.9%)                    | 3 (1.3%)                        | 125 (5.9%)                        | 24 (4.5%)                   | 0 (0%)                          | 8 (3.9%)                    | 6 (1.4%)                      | 4 (0.6%)                    | 8 (3.2%)                    | 0 (0%)                               |
| >=65                            | 96 (15%)                        | 17 (3.1%)                    | 5 (1.4%)                      | 56 (15%)                     | 10 (2.9%)                   | 2 (0.4%)                    | 3 (1.3%)                        | 149 (7.0%)                        | 10 (1.9%)                   | 0 (0%)                          | 40 (20%)                    | 2 (0.5%)                      | 1 (0.2%)                    | 1 (0.4%)                    | 0 (0%)                               |
| <b>Gender</b>                   |                                 |                              |                               |                              |                             |                             |                                 |                                   |                             |                                 |                             |                               |                             |                             |                                      |
| Female                          | 376 (59%)                       | 395 (71%)                    | 181 (49%)                     | 297 (81%)                    | 251 (73%)                   | 266 (58%)                   | 119 (52%)                       | 1,186 (56%)                       | 269 (51%)                   | 396 (82%)                       | 133 (66%)                   | 291 (66%)                     | 376 (58%)                   | 201 (80%)                   | 523 (78%)                            |
| Male                            | 260 (41%)                       | 157 (28%)                    | 177 (48%)                     | 64 (17%)                     | 84 (25%)                    | 195 (42%)                   | 107 (47%)                       | 940 (44%)                         | 260 (49%)                   | 86 (18%)                        | 70 (34%)                    | 149 (34%)                     | 269 (42%)                   | 49 (20%)                    | 140 (21%)                            |
| Non-binary                      | 3 (0.5%)                        | 1 (0.2%)                     | 11 (3.0%)                     | 7 (1.9%)                     | 7 (2.0%)                    | 0 (0%)                      | 3 (1.3%)                        | 1 (<0.1%)                         | 0 (0%)                      | 0 (0%)                          | 0 (0%)                      | 0 (0%)                        | 0 (0%)                      | 0 (0%)                      | 4 (0.6%)                             |
| <b>Marital</b>                  |                                 |                              |                               |                              |                             |                             |                                 |                                   |                             |                                 |                             |                               |                             |                             |                                      |
| Married/Cohabitation/Common-law | 332 (52%)                       | 256 (46%)                    | 236 (64%)                     | 256 (70%)                    | 120 (35%)                   | 274 (59%)                   | 71 (31%)                        | 1,330 (63%)                       | 275 (52%)                   | 42 (8.7%)                       | 145 (71%)                   | 172 (39%)                     | 211 (33%)                   | 123 (49%)                   | 113 (17%)                            |
| Separated/Divorced/Widowed      | 91 (14%)                        | 39 (7.1%)                    | 14 (3.8%)                     | 40 (11%)                     | 39 (11%)                    | 17 (3.7%)                   | 3 (1.3%)                        | 99 (4.7%)                         | 28 (5.3%)                   | 0 (0%)                          | 24 (12%)                    | 12 (2.7%)                     | 15 (2.3%)                   | 5 (2.0%)                    | 8 (1.2%)                             |
| Single                          | 215 (34%)                       | 258 (47%)                    | 119 (32%)                     | 72 (20%)                     | 183 (54%)                   | 170 (37%)                   | 155 (68%)                       | 698 (33%)                         | 226 (43%)                   | 440 (91%)                       | 34 (17%)                    | 256 (58%)                     | 419 (65%)                   | 122 (49%)                   | 546 (82%)                            |
| Unknown                         | 1 (0.2%)                        | 0 (0%)                       | 0 (0%)                        | 0 (0%)                       | 0 (0%)                      | 0 (0%)                      | 0 (0%)                          | 0 (0%)                            | 0 (0%)                      | 0 (0%)                          | 0 (0%)                      | 0 (0%)                        | 0 (0%)                      | 0 (0%)                      | 0 (0%)                               |
| <b>Education</b>                |                                 |                              |                               |                              |                             |                             |                                 |                                   |                             |                                 |                             |                               |                             |                             |                                      |
| Primary or below                | 0 (0%)                          | 1 (0.2%)                     | 139 (38%)                     | 1 (0.3%)                     | 3 (0.9%)                    | 1 (0.2%)                    | 0 (0%)                          | 167 (7.9%)                        | 42 (7.9%)                   | 0 (0%)                          | 3 (1.5%)                    | 6 (1.4%)                      | 3 (0.5%)                    | 0 (0%)                      | 2 (0.3%)                             |
| Secondary                       | 156 (24%)                       | 61 (11%)                     | 180 (49%)                     | 44 (12%)                     | 68 (20%)                    | 28 (6.1%)                   | 49 (21%)                        | 1,123 (53%)                       | 61 (12%)                    | 0 (0%)                          | 6 (3.0%)                    | 49 (11%)                      | 96 (15%)                    | 24 (9.6%)                   | 59 (8.8%)                            |
| College                         | 195 (31%)                       | 52 (9.4%)                    | 16 (4.3%)                     | 103 (28%)                    | 124 (36%)                   | 33 (7.2%)                   | 71 (31%)                        | 181 (8.5%)                        | 43 (8.1%)                   | 91 (19%)                        | 12 (5.9%)                   | 27 (6.1%)                     | 68 (11%)                    | 4 (1.6%)                    | 103 (15%)                            |
| Associate degree                | 130 (20%)                       | 9 (1.6%)                     | 6 (1.6%)                      | 7 (1.9%)                     | 8 (2.3%)                    | 23 (5.0%)                   | 2 (0.9%)                        | 196 (9.2%)                        | 40 (7.6%)                   | 170 (35%)                       | 63 (31%)                    | 73 (17%)                      | 92 (14%)                    | 158 (63%)                   | 8 (1.2%)                             |

|                           |                                 |                                 |                                 |                                 |                                 |                                 |                                 |                                 |                                 |                                 |                                 |                                 |                                 |                                 |                                 |
|---------------------------|---------------------------------|---------------------------------|---------------------------------|---------------------------------|---------------------------------|---------------------------------|---------------------------------|---------------------------------|---------------------------------|---------------------------------|---------------------------------|---------------------------------|---------------------------------|---------------------------------|---------------------------------|
| Bachelor                  | 76 (12%)                        | 154 (28%)                       | 24 (6.5%)                       | 126 (34%)                       | 51 (15%)                        | 230 (50%)                       | 45 (20%)                        | 415 (20%)                       | 142 (27%)                       | 208 (43%)                       | 20 (9.9%)                       | 199 (45%)                       | 291 (45%)                       | 51 (20%)                        | 350 (52%)                       |
| Graduate                  | 43 (6.7%)                       | 276 (50%)                       | 4 (1.1%)                        | 87 (24%)                        | 88 (26%)                        | 146 (32%)                       | 62 (27%)                        | 45 (2.1%)                       | 197 (37%)                       | 13 (2.7%)                       | 99 (49%)                        | 86 (20%)                        | 95 (15%)                        | 13 (5.2%)                       | 140 (21%)                       |
| Unkown                    | 39 (6.1%)                       | 0 (0%)                          | 0 (0%)                          | 0 (0%)                          | 0 (0%)                          | 0 (0%)                          | 0 (0%)                          | 0 (0%)                          | 4 (0.8%)                        | 0 (0%)                          | 0 (0%)                          | 0 (0%)                          | 0 (0%)                          | 0 (0%)                          | 5 (0.7%)                        |
| <b>Employment</b>         |                                 |                                 |                                 |                                 |                                 |                                 |                                 |                                 |                                 |                                 |                                 |                                 |                                 |                                 |                                 |
| Job seeking               | 74 (12%)                        | 10 (1.8%)                       | 16 (4.3%)                       | 19 (5.2%)                       | 23 (6.7%)                       | 24 (5.2%)                       | 6 (2.6%)                        | 69 (3.2%)                       | 29 (5.5%)                       | 5 (1.0%)                        | 6 (3.0%)                        | 60 (14%)                        | 48 (7.4%)                       | 3 (1.2%)                        | 55 (8.2%)                       |
| Laid off                  | 53 (8.3%)                       | 1 (0.2%)                        | 11 (3.0%)                       | 10 (2.7%)                       | 0 (0%)                          | 0 (0%)                          | 2 (0.9%)                        | 45 (2.1%)                       | 1 (0.2%)                        | 0 (0%)                          | 0 (0%)                          | 5 (1.1%)                        | 2 (0.3%)                        | 0 (0%)                          | 4 (0.6%)                        |
| Not in workforce          | 34 (5.3%)                       | 8 (1.4%)                        | 4 (1.1%)                        | 50 (14%)                        | 14 (4.1%)                       | 46 (10.0%)                      | 0 (0%)                          | 214 (10%)                       | 59 (11%)                        | 2 (0.4%)                        | 9 (4.4%)                        | 34 (7.7%)                       | 25 (3.9%)                       | 4 (1.6%)                        | 7 (1.0%)                        |
| Retired                   | 41 (6.4%)                       | 31 (5.6%)                       | 3 (0.8%)                        | 80 (22%)                        | 12 (3.5%)                       | 7 (1.5%)                        | 1 (0.4%)                        | 185 (8.7%)                      | 12 (2.3%)                       | 0 (0%)                          | 45 (22%)                        | 2 (0.5%)                        | 2 (0.3%)                        | 2 (0.8%)                        | 2 (0.3%)                        |
| Self-employed             | 4 (0.6%)                        | 62 (11%)                        | 215 (58%)                       | 28 (7.6%)                       | 18 (5.3%)                       | 50 (11%)                        | 23 (10%)                        | 34 (1.6%)                       | 57 (11%)                        | 11 (2.3%)                       | 26 (13%)                        | 39 (8.9%)                       | 51 (7.9%)                       | 13 (5.2%)                       | 7 (1.0%)                        |
| Student                   | 47 (7.4%)                       | 130 (24%)                       | 58 (16%)                        | 26 (7.1%)                       | 88 (26%)                        | 89 (19%)                        | 99 (43%)                        | 162 (7.6%)                      | 159 (30%)                       | 417 (87%)                       | 6 (3.0%)                        | 149 (34%)                       | 265 (41%)                       | 57 (23%)                        | 383 (57%)                       |
| Working (>=40hrs/wk)      | 58 (9.1%)                       | 210 (38%)                       | 21 (5.7%)                       | 85 (23%)                        | 153 (45%)                       | 136 (30%)                       | 65 (28%)                        | 1,082 (51%)                     | 153 (29%)                       | 27 (5.6%)                       | 55 (27%)                        | 69 (16%)                        | 75 (12%)                        | 87 (35%)                        | 128 (19%)                       |
| Working (1-39hrs/wk)      | 328 (51%)                       | 101 (18%)                       | 41 (11%)                        | 70 (19%)                        | 34 (9.9%)                       | 109 (24%)                       | 33 (14%)                        | 336 (16%)                       | 59 (11%)                        | 20 (4.1%)                       | 56 (28%)                        | 82 (19%)                        | 177 (27%)                       | 84 (34%)                        | 81 (12%)                        |
| <b>Height (m)</b>         |                                 |                                 |                                 |                                 |                                 |                                 |                                 |                                 |                                 |                                 |                                 |                                 |                                 |                                 |                                 |
|                           | 1.69 (0.08)                     | 1.67 (0.10)                     | 1.63 (0.05)                     | 1.67 (0.10)                     | 1.64 (0.08)                     | 1.68 (0.10)                     | 1.66 (0.10)                     | 1.64 (0.08)                     | 1.64 (0.10)                     | 1.60 (0.06)                     | 1.69 (0.08)                     | 1.67 (0.09)                     | 1.67 (0.11)                     | 1.62 (0.08)                     | 1.64 (0.07)                     |
|                           | (1.50 to<br>1.96)               | (1.16 to<br>1.94)               | (1.52 to<br>1.90)               | (1.28 to<br>2.11)               | (1.40 to<br>1.90)               | (1.30 to<br>1.97)               | (1.44 to<br>1.98)               | (1.37 to<br>1.98)               | (1.43 to<br>1.96)               | (1.45 to<br>1.84)               | (1.50 to<br>1.94)               | (1.47 to<br>1.98)               | (1.20 to<br>2.00)               | (1.49 to<br>1.98)               | (1.30 to<br>1.86)               |
| Unknown                   | 12                              | 0                               | 1                               | 5                               | 0                               | 0                               | 2                               | 1                               | 4                               | 0                               | 0                               | 3                               | 2                               | 0                               | 2                               |
| <b>Weight(kg)</b>         |                                 |                                 |                                 |                                 |                                 |                                 |                                 |                                 |                                 |                                 |                                 |                                 |                                 |                                 |                                 |
|                           | 72 (14) (27<br>to 130)          | 70 (16) (37<br>to 120)          | 60 (6) (45 to<br>89)            | 75 (18) (31<br>to 127)          | 71 (14) (41<br>to 113)          | 80 (18) (40<br>to 160)          | 68 (14) (39<br>to 110)          | 62 (10) (39<br>to 117)          | 66 (13) (34<br>to 104)          | 55 (11) (33<br>to 103)          | 70 (15) (45<br>to 122)          | 70 (16) (40<br>to 140)          | 71 (17) (36<br>to 150)          | 58 (13) (30<br>to 110)          | 61 (17) (35<br>to 135)          |
| Unknown                   | 9                               | 0                               | 0                               | 8                               | 0                               | 0                               | 2                               | 0                               | 4                               | 0                               | 0                               | 0                               | 0                               | 0                               | 2                               |
| <b>BMI</b>                |                                 |                                 |                                 |                                 |                                 |                                 |                                 |                                 |                                 |                                 |                                 |                                 |                                 |                                 |                                 |
|                           | 25.2 (4.1)<br>(11.7 to<br>45.8) | 25.2 (4.7)<br>(15.6 to<br>42.0) | 22.5 (1.9)<br>(15.5 to<br>34.0) | 26.8 (5.6)<br>(13.5 to<br>43.8) | 26.3 (4.2)<br>(17.6 to<br>44.4) | 28.2 (5.6)<br>(15.4 to<br>62.4) | 24.4 (4.1)<br>(13.9 to<br>37.1) | 22.8 (3.0)<br>(13.4 to<br>38.2) | 24.4 (3.9)<br>(14.5 to<br>36.1) | 21.4 (3.9)<br>(14.1 to<br>40.3) | 24.7 (4.4)<br>(17.3 to<br>38.9) | 25.0 (4.7)<br>(13.8 to<br>48.4) | 25.6 (5.6)<br>(12.9 to<br>52.1) | 21.9 (4.0)<br>(11.0 to<br>37.5) | 22.4 (5.8)<br>(12.1 to<br>48.4) |
| Unknown                   | 15                              | 0                               | 1                               | 9                               | 0                               | 0                               | 4                               | 1                               | 5                               | 0                               | 0                               | 3                               | 2                               | 0                               | 2                               |
| <b>BMI classification</b> |                                 |                                 |                                 |                                 |                                 |                                 |                                 |                                 |                                 |                                 |                                 |                                 |                                 |                                 |                                 |
| Severely underweight      | 7 (1.1%)                        | 1 (0.2%)                        | 2 (0.5%)                        | 2 (0.6%)                        | 0 (0%)                          | 1 (0.2%)                        | 4 (1.8%)                        | 9 (0.4%)                        | 6 (1.1%)                        | 18 (3.7%)                       | 0 (0%)                          | 1 (0.2%)                        | 11 (1.7%)                       | 10 (4.0%)                       | 15 (2.3%)                       |
| Underweight               | 17 (2.7%)                       | 17 (3.1%)                       | 2 (0.5%)                        | 7 (1.9%)                        | 4 (1.2%)                        | 8 (1.7%)                        | 4 (1.8%)                        | 126 (5.9%)                      | 21 (4.0%)                       | 90 (19%)                        | 4 (2.0%)                        | 21 (4.8%)                       | 22 (3.4%)                       | 38 (15%)                        | 100 (15%)                       |
| Normal weight             | 281 (45%)                       | 280 (51%)                       | 344 (93%)                       | 142 (40%)                       | 132 (39%)                       | 68 (15%)                        | 123 (55%)                       | 925 (44%)                       | 174 (33%)                       | 240 (50%)                       | 118 (58%)                       | 148 (34%)                       | 297 (46%)                       | 120 (48%)                       | 356 (54%)                       |
| Overweight                | 241 (39%)                       | 171 (31%)                       | 15 (4.1%)                       | 114 (32%)                       | 143 (42%)                       | 59 (13%)                        | 72 (32%)                        | 620 (29%)                       | 91 (17%)                        | 58 (12%)                        | 58 (29%)                        | 62 (14%)                        | 201 (31%)                       | 32 (13%)                        | 68 (10%)                        |
| Obesity                   | 78 (12%)                        | 84 (15%)                        | 5 (1.4%)                        | 94 (26%)                        | 63 (18%)                        | 325 (70%)                       | 22 (9.8%)                       | 446 (21%)                       | 232 (44%)                       | 76 (16%)                        | 23 (11%)                        | 205 (47%)                       | 112 (17%)                       | 50 (20%)                        | 126 (19%)                       |

|                                                  |                   |                |                |                   |                    |                       |                       |                   |                       |                   |                    |                   |                   |                   |                   |  |
|--------------------------------------------------|-------------------|----------------|----------------|-------------------|--------------------|-----------------------|-----------------------|-------------------|-----------------------|-------------------|--------------------|-------------------|-------------------|-------------------|-------------------|--|
| Unknown                                          | 15                | 0              | 1              | 9                 | 0                  | 0                     | 4                     | 1                 | 5                     | 0                 | 0                  | 3                 | 2                 | 0                 | 2                 |  |
| <b>Pregnant</b>                                  |                   |                |                |                   |                    |                       |                       |                   |                       |                   |                    |                   |                   |                   |                   |  |
| Not applicable                                   | 261 (41%)         | 157 (28%)      | 177 (48%)      | 64 (17%)          | 84 (25%)           | 219 (48%)             | 107 (47%)             | 940 (44%)         | 260 (49%)             | 86 (18%)          | 71 (35%)           | 159 (36%)         | 269 (42%)         | 49 (20%)          | 141 (21%)         |  |
| No                                               | 372 (58%)         | 393 (71%)      | 159 (43%)      | 280 (76%)         | 256 (75%)          | 242 (52%)             | 119 (52%)             | 1,177 (55%)       | 268 (51%)             | 390 (81%)         | 131 (65%)          | 277 (63%)         | 357 (55%)         | 189 (76%)         | 506 (76%)         |  |
| Yes                                              | 6 (0.9%)          | 3 (0.5%)       | 33 (8.9%)      | 24 (6.5%)         | 2 (0.6%)           | 0 (0%)                | 3 (1.3%)              | 10 (0.5%)         | 1 (0.2%)              | 6 (1.2%)          | 1 (0.5%)           | 4 (0.9%)          | 19 (2.9%)         | 12 (4.8%)         | 20 (3.0%)         |  |
| <b>Gestational week</b>                          |                   |                |                |                   |                    |                       |                       |                   |                       |                   |                    |                   |                   |                   |                   |  |
| Unknown                                          | 22 (13) (6 to 40) | 6 (1) (6 to 7) | 4 (1) (3 to 7) | 24 (12) (4 to 39) | 30 (NA) (30 to 30) | NA (NA) (Inf to -Inf) | NA (NA) (Inf to -Inf) | 24 (9) (15 to 40) | NA (NA) (Inf to -Inf) | 19 (12) (8 to 32) | 12 (NA) (12 to 12) | 16 (12) (6 to 30) | 22 (12) (9 to 36) | 30 (13) (5 to 40) | 30 (12) (4 to 41) |  |
| Unknown                                          | 633               | 551            | 348            | 345               | 341                | 461                   | 229                   | 2,117             | 529                   | 477               | 202                | 436               | 638               | 238               | 655               |  |
| <b>Regular medical follow-up before COVID-19</b> |                   |                |                |                   |                    |                       |                       |                   |                       |                   |                    |                   |                   |                   |                   |  |
| NA                                               | 1 (0.2%)          | 0 (0%)         | 0 (0%)         | 0 (0%)            | 0 (0%)             | 0 (0%)                | 0 (0%)                | 0 (0%)            | 0 (0%)                | 0 (0%)            | 0 (0%)             | 0 (0%)            | 0 (0%)            | 0 (0%)            | 0 (0%)            |  |
| No                                               | 475 (74%)         | 393 (71%)      | 352 (95%)      | 119 (32%)         | 207 (61%)          | 347 (75%)             | 170 (74%)             | 1,606 (76%)       | 377 (71%)             | 365 (76%)         | 44 (22%)           | 287 (65%)         | 450 (70%)         | 199 (80%)         | 628 (94%)         |  |
| Yes                                              | 163 (26%)         | 160 (29%)      | 17 (4.6%)      | 249 (68%)         | 135 (39%)          | 114 (25%)             | 59 (26%)              | 521 (24%)         | 152 (29%)             | 117 (24%)         | 159 (78%)          | 153 (35%)         | 195 (30%)         | 51 (20%)          | 39 (5.8%)         |  |
| <b>Practising healthcare professional</b>        |                   |                |                |                   |                    |                       |                       |                   |                       |                   |                    |                   |                   |                   |                   |  |
| NA                                               | 0 (0%)            | 0 (0%)         | 0 (0%)         | 0 (0%)            | 0 (0%)             | 0 (0%)                | 0 (0%)                | 0 (0%)            | 0 (0%)                | 1 (0.2%)          | 0 (0%)             | 0 (0%)            | 0 (0%)            | 0 (0%)            | 0 (0%)            |  |
| No                                               | 563 (88%)         | 339 (61%)      | 356 (96%)      | 332 (90%)         | 303 (89%)          | 253 (55%)             | 177 (77%)             | 2,068 (97%)       | 342 (65%)             | 261 (54%)         | 184 (91%)          | 261 (59%)         | 427 (66%)         | 148 (59%)         | 645 (97%)         |  |
| Yes                                              | 76 (12%)          | 214 (39%)      | 13 (3.5%)      | 36 (9.8%)         | 39 (11%)           | 208 (45%)             | 52 (23%)              | 59 (2.8%)         | 187 (35%)             | 220 (46%)         | 19 (9.4%)          | 179 (41%)         | 218 (34%)         | 102 (41%)         | 22 (3.3%)         |  |
| <b>Number of children less than 18 years old</b> |                   |                |                |                   |                    |                       |                       |                   |                       |                   |                    |                   |                   |                   |                   |  |
| No                                               | 513 (80%)         | 410 (74%)      | 153 (41%)      | 242 (66%)         | 220 (64%)          | 215 (47%)             | 182 (79%)             | 1,518 (71%)       | 328 (62%)             | 465 (96%)         | 145 (71%)          | 307 (70%)         | 474 (73%)         | 132 (53%)         | 383 (57%)         |  |
| Yes                                              | 126 (20%)         | 143 (26%)      | 216 (59%)      | 126 (34%)         | 122 (36%)          | 246 (53%)             | 47 (21%)              | 609 (29%)         | 201 (38%)             | 17 (3.5%)         | 58 (29%)           | 133 (30%)         | 171 (27%)         | 118 (47%)         | 284 (43%)         |  |
| <b>Number of children aged above 18</b>          |                   |                |                |                   |                    |                       |                       |                   |                       |                   |                    |                   |                   |                   |                   |  |
| Unknown                                          | 0.34 (0.74)       | 0.40 (0.82)    | 1.25 (1.21)    | 0.61 (1.01)       | 0.55 (0.88)        | 1.13 (1.27)           | 0.32 (0.74)           | 0.39 (0.68)       | 0.59 (0.86)           | 0.04 (0.20)       | 0.47 (0.83)        | 0.69 (1.17)       | 0.71 (1.39)       | 0.80 (1.05)       | 0.54 (0.75)       |  |
|                                                  | (0.00 to 3.00)    | (0.00 to 8.00) | (0.00 to 6.00) | (0.00 to 5.00)    | (0.00 to 5.00)     | (0.00 to 5.00)        | (0.00 to 5.00)        | (0.00 to 4.00)    | (0.00 to 5.00)        | (0.00 to 2.00)    | (0.00 to 3.00)     | (0.00 to 5.00)    | (0.00 to 6.00)    | (0.00 to 7.00)    | (0.00 to 6.00)    |  |
| Unknown                                          | 0                 | 7              | 1              | 3                 | 3                  | 9                     | 3                     | 0                 | 1                     | 0                 | 0                  | 0                 | 11                | 1                 | 7                 |  |
| <b>Number of people lived with</b>               |                   |                |                |                   |                    |                       |                       |                   |                       |                   |                    |                   |                   |                   |                   |  |
| Unknown                                          | 2.90 (1.19)       | 2.89 (1.29)    | 4.08 (1.31)    | 2.61 (1.37)       | 3.26 (1.44)        | 4.67 (1.83)           | 4.52 (2.25)           | 3.35 (1.08)       | 3.86 (1.72)           | 4.35 (1.30)       | 2.50 (1.17)        | 4.60 (1.54)       | 6.19 (2.88)       | 3.84 (1.45)       | 3.75 (1.39)       |  |
|                                                  | (1.00 to 6.00)    | (1.00 to 7.00) | (1.00 to 8.00) | (1.00 to 7.00)    | (1.00 to 8.00)     | (1.00 to 17.00)       | (1.00 to 12.00)       | (1.00 to 9.00)    | (1.00 to 20.00)       | (1.00 to 9.00)    | (1.00 to 6.00)     | (1.00 to 11.00)   | (1.00 to 26.00)   | (1.00 to 12.00)   | (1.00 to 10.00)   |  |
| Unknown                                          | 51                | 0              | 2              | 2                 | 0                  | 4                     | 0                     | 0                 | 2                     | 0                 | 2                  | 0                 | 21                | 0                 | 12                |  |
| <b>Perceived social rank</b>                     |                   |                |                |                   |                    |                       |                       |                   |                       |                   |                    |                   |                   |                   |                   |  |
| Unknown                                          | 3.13 (0.93)       | 3.42 (0.79)    | 1.66 (0.68)    | 3.46 (0.93)       | 3.12 (0.77)        | 3.32 (0.91)           | 3.15 (0.75)           | 2.73 (0.76)       | 3.18 (1.08)           | 3.51 (0.87)       | 3.60 (0.69)        | 3.03 (0.81)       | 3.21 (1.11)       | 3.21 (0.70)       | 2.77 (0.77)       |  |
|                                                  | (1.00 to 1.00)    | (1.00 to 1.00) | (1.00 to 1.00) | (1.00 to 1.00)    | (1.00 to 1.00)     | (1.00 to 1.00)        | (1.00 to 1.00)        | (1.00 to 1.00)    | (1.00 to 1.00)        | (1.00 to 2.00)    | (1.00 to 1.00)     | (1.00 to 1.00)    | (1.00 to 1.00)    | (1.00 to 1.00)    | (1.00 to 1.00)    |  |

|            |             |              |             |             |             |              |             |                  |           |             |              |              |             |             |              |
|------------|-------------|--------------|-------------|-------------|-------------|--------------|-------------|------------------|-----------|-------------|--------------|--------------|-------------|-------------|--------------|
|            | 5:00)       | 5:00)        | 4:00)       | 5:00)       | 5:00)       | 5:00)        | 5:00)       | 5:00)            | 5:00)     | 5:00)       | 5:00)        | 5:00)        | 5:00)       | 5:00)       | 5:00)        |
| Unknown    | 1           | 0            | 0           | 0           | 0           | 0            | 0           | 0                | 1         | 1           | 0            | 0            | 0           | 0           | 1            |
| House size | 175 (138)   | 131 (91) (10 | 83 (26) (10 | 146 (91) (3 | 91 (56) (10 | 119 (60) (10 | 148 (126)   | 38 (18) (9 to 57 | 67) (1 to | 243 (141)   | 114 (48) (40 | 145 (78) (10 | 234 (138)   | 153 (142)   | 112 (49) (11 |
|            | (10 to 575) | to 500)      | to 202)     | to 550)     | to 400)     | to 400)      | (10 to 550) | 195)             | 581)      | (10 to 590) | to 315)      | to 570)      | (11 to 500) | (10 to 570) | to 400)      |
| Unknown    | 452         | 35           | 3           | 116         | 27          | 2            | 40          | 1                | 44        | 0           | 4            | 47           | 360         | 0           | 2            |

(Continued)

| Characteristic                  | Malaysia, N = 535 <sup>1</sup> | Mexico, N = 1,016 <sup>1</sup> | Nigeria, N = 590 <sup>1</sup> | Philippines, N = 457 <sup>1</sup> | Republic Of Sudan, N = 538 <sup>1</sup> | Rwanda, N = 150 <sup>1</sup> | Saudi Arabia, N = 631 <sup>1</sup> | Singapore, N = 237 <sup>1</sup> | South Africa, N = 198 <sup>1</sup> | South Korea, N = 2,238 <sup>1</sup> | Spain, N = 51 <sup>1</sup> | Thailand, N = 723 <sup>1</sup> | United Kingdom, N = 212 <sup>1</sup> | United States, N = 213 <sup>1</sup> | Vietnam, N = 419 <sup>1</sup> |
|---------------------------------|--------------------------------|--------------------------------|-------------------------------|-----------------------------------|-----------------------------------------|------------------------------|------------------------------------|---------------------------------|------------------------------------|-------------------------------------|----------------------------|--------------------------------|--------------------------------------|-------------------------------------|-------------------------------|
| <b>Age</b>                      |                                |                                |                               |                                   |                                         |                              |                                    |                                 |                                    |                                     |                            |                                |                                      |                                     |                               |
| 18-24                           | 315 (59%)                      | 389 (38%)                      | 171 (29%)                     | 225 (49%)                         | 375 (70%)                               | 10 (6.7%)                    | 220 (35%)                          | 80 (34%)                        | 101 (51%)                          | 161 (7.2%)                          | 12 (24%)                   | 152 (21%)                      | 83 (39%)                             | 19 (8.9%)                           | 196 (47%)                     |
| 25-29                           | 23 (4.3%)                      | 140 (14%)                      | 255 (43%)                     | 46 (10%)                          | 85 (16%)                                | 53 (35%)                     | 121 (19%)                          | 13 (5.5%)                       | 19 (9.6%)                          | 290 (13%)                           | 2 (3.9%)                   | 109 (15%)                      | 27 (13%)                             | 32 (15%)                            | 34 (8.1%)                     |
| 30-34                           | 45 (8.4%)                      | 95 (9.4%)                      | 81 (14%)                      | 54 (12%)                          | 21 (3.9%)                               | 44 (29%)                     | 84 (13%)                           | 26 (11%)                        | 17 (8.6%)                          | 227 (10%)                           | 1 (2.0%)                   | 136 (19%)                      | 30 (14%)                             | 32 (15%)                            | 61 (15%)                      |
| 35-39                           | 25 (4.7%)                      | 99 (9.7%)                      | 38 (6.4%)                     | 29 (6.3%)                         | 9 (1.7%)                                | 24 (16%)                     | 73 (12%)                           | 34 (14%)                        | 20 (10%)                           | 222 (9.9%)                          | 5 (9.8%)                   | 104 (14%)                      | 25 (12%)                             | 28 (13%)                            | 77 (18%)                      |
| 40-44                           | 26 (4.9%)                      | 101 (9.9%)                     | 18 (3.1%)                     | 20 (4.4%)                         | 13 (2.4%)                               | 12 (8.0%)                    | 45 (7.1%)                          | 29 (12%)                        | 10 (5.1%)                          | 273 (12%)                           | 10 (20%)                   | 93 (13%)                       | 15 (7.1%)                            | 21 (9.9%)                           | 26 (6.2%)                     |
| 45-49                           | 45 (8.4%)                      | 62 (6.1%)                      | 13 (2.2%)                     | 18 (3.9%)                         | 12 (2.2%)                               | 3 (2.0%)                     | 44 (7.0%)                          | 25 (11%)                        | 13 (6.6%)                          | 178 (8.0%)                          | 10 (20%)                   | 49 (6.8%)                      | 8 (3.8%)                             | 30 (14%)                            | 16 (3.8%)                     |
| 50-54                           | 34 (6.4%)                      | 47 (4.6%)                      | 10 (1.7%)                     | 27 (5.9%)                         | 13 (2.4%)                               | 1 (0.7%)                     | 24 (3.8%)                          | 12 (5.1%)                       | 3 (1.5%)                           | 288 (13%)                           | 4 (7.8%)                   | 32 (4.4%)                      | 7 (3.3%)                             | 14 (6.6%)                           | 8 (1.9%)                      |
| 55-59                           | 10 (1.9%)                      | 36 (3.5%)                      | 3 (0.5%)                      | 17 (3.7%)                         | 4 (0.7%)                                | 2 (1.3%)                     | 10 (1.6%)                          | 7 (3.0%)                        | 9 (4.5%)                           | 156 (7.0%)                          | 4 (7.8%)                   | 22 (3.0%)                      | 7 (3.3%)                             | 11 (5.2%)                           | 1 (0.2%)                      |
| 60-64                           | 7 (1.3%)                       | 31 (3.1%)                      | 1 (0.2%)                      | 6 (1.3%)                          | 4 (0.7%)                                | 1 (0.7%)                     | 8 (1.3%)                           | 6 (2.5%)                        | 6 (3.0%)                           | 321 (14%)                           | 0 (0%)                     | 10 (1.4%)                      | 4 (1.9%)                             | 11 (5.2%)                           | 0 (0%)                        |
| >=65                            | 5 (0.9%)                       | 16 (1.6%)                      | 0 (0%)                        | 15 (3.3%)                         | 2 (0.4%)                                | 0 (0%)                       | 2 (0.3%)                           | 5 (2.1%)                        | 0 (0%)                             | 122 (5.5%)                          | 3 (5.9%)                   | 16 (2.2%)                      | 6 (2.8%)                             | 15 (7.0%)                           | 0 (0%)                        |
| <b>Gender</b>                   |                                |                                |                               |                                   |                                         |                              |                                    |                                 |                                    |                                     |                            |                                |                                      |                                     |                               |
| Female                          | 367 (69%)                      | 661 (65%)                      | 331 (56%)                     | 324 (71%)                         | 345 (64%)                               | 41 (27%)                     | 372 (59%)                          | 169 (71%)                       | 136 (69%)                          | 1,128 (50%)                         | 34 (67%)                   | 512 (71%)                      | 155 (73%)                            | 191 (90%)                           | 325 (78%)                     |
| Male                            | 166 (31%)                      | 347 (34%)                      | 255 (43%)                     | 124 (27%)                         | 193 (36%)                               | 106 (71%)                    | 259 (41%)                          | 66 (28%)                        | 61 (31%)                           | 1,103 (49%)                         | 16 (31%)                   | 192 (27%)                      | 56 (26%)                             | 20 (9.4%)                           | 90 (21%)                      |
| Non-binary                      | 2 (0.4%)                       | 8 (0.8%)                       | 4 (0.7%)                      | 9 (2.0%)                          | 0 (0%)                                  | 3 (2.0%)                     | 0 (0%)                             | 2 (0.8%)                        | 1 (0.5%)                           | 7 (0.3%)                            | 1 (2.0%)                   | 19 (2.6%)                      | 1 (0.5%)                             | 2 (0.9%)                            | 4 (1.0%)                      |
| <b>Marital</b>                  |                                |                                |                               |                                   |                                         |                              |                                    |                                 |                                    |                                     |                            |                                |                                      |                                     |                               |
| Married/Cohabitation/Common-law | 179 (33%)                      | 309 (30%)                      | 156 (26%)                     | 124 (27%)                         | 75 (14%)                                | 69 (46%)                     | 283 (45%)                          | 109 (46%)                       | 67 (34%)                           | 1,331 (59%)                         | 31 (61%)                   | 168 (23%)                      | 96 (45%)                             | 127 (60%)                           | 195 (47%)                     |
| Separated/Divorced/Widowed      | 7 (1.3%)                       | 59 (5.8%)                      | 7 (1.2%)                      | 16 (3.5%)                         | 9 (1.7%)                                | 5 (3.3%)                     | 20 (3.2%)                          | 6 (2.5%)                        | 7 (3.5%)                           | 112 (5.0%)                          | 2 (3.9%)                   | 18 (2.5%)                      | 9 (4.2%)                             | 14 (6.6%)                           | 7 (1.7%)                      |
| Single                          | 349 (65%)                      | 648 (64%)                      | 427 (72%)                     | 317 (69%)                         | 454 (84%)                               | 76 (51%)                     | 328 (52%)                          | 122 (51%)                       | 124 (63%)                          | 795 (36%)                           | 18 (35%)                   | 537 (74%)                      | 107 (50%)                            | 72 (34%)                            | 217 (52%)                     |
| <b>Education</b>                |                                |                                |                               |                                   |                                         |                              |                                    |                                 |                                    |                                     |                            |                                |                                      |                                     |                               |
| Primary or below                | 3 (0.6%)                       | 12 (1.2%)                      | 3 (0.5%)                      | 3 (0.7%)                          | 3 (0.6%)                                | 0 (0%)                       | 5 (0.8%)                           | 1 (0.4%)                        | 0 (0%)                             | 3 (0.1%)                            | 0 (0%)                     | 3 (0.4%)                       | 0 (0%)                               | 1 (0.5%)                            | 0 (0%)                        |
| Secondary                       | 35 (6.5%)                      | 206 (20%)                      | 28 (4.7%)                     | 58 (13%)                          | 58 (11%)                                | 25 (17%)                     | 105 (17%)                          | 2 (0.8%)                        | 35 (18%)                           | 16 (0.7%)                           | 9 (18%)                    | 25 (3.5%)                      | 15 (7.1%)                            | 2 (0.9%)                            | 4 (1.0%)                      |
| College                         | 89 (17%)                       | 162 (16%)                      | 166 (28%)                     | 115 (25%)                         | 22 (4.1%)                               | 9 (6.0%)                     | 21 (3.3%)                          | 47 (20%)                        | 23 (12%)                           | 405 (18%)                           | 12 (24%)                   | 6 (0.8%)                       | 49 (23%)                             | 2 (0.9%)                            | 7 (1.7%)                      |

|                      |                                  |                                  |                                  |                                  |                                     |                                  |                                  |                                  |                                  |                        |                               |                                     |                                  |                                  |                                  |                                  |
|----------------------|----------------------------------|----------------------------------|----------------------------------|----------------------------------|-------------------------------------|----------------------------------|----------------------------------|----------------------------------|----------------------------------|------------------------|-------------------------------|-------------------------------------|----------------------------------|----------------------------------|----------------------------------|----------------------------------|
| Associate degree     | 115 (21%)                        | 3 (0.3%)                         | 22 (3.7%)                        | 9 (2.0%)                         | 26 (4.8%)                           | 8 (5.3%)                         | 20 (3.2%)                        | 1 (0.4%)                         | 2 (1.0%)                         | 344 (15%)              | 3 (5.9%)                      | 8 (1.1%)                            | 3 (1.4%)                         | 2 (0.9%)                         | 25 (6.0%)                        |                                  |
| Bachelor             | 265 (50%)                        | 358 (35%)                        | 299 (51%)                        | 191 (42%)                        | 392 (73%)                           | 68 (45%)                         | 389 (62%)                        | 132 (56%)                        | 105 (53%)                        | 1,222 (55%)            | 5 (9.8%)                      | 296 (41%)                           | 86 (41%)                         | 14 (6.6%)                        | 296 (71%)                        |                                  |
| Graduate             | 27 (5.0%)                        | 275 (27%)                        | 72 (12%)                         | 81 (18%)                         | 37 (6.9%)                           | 39 (26%)                         | 90 (14%)                         | 54 (23%)                         | 33 (17%)                         | 248 (11%)              | 22 (43%)                      | 382 (53%)                           | 58 (27%)                         | 75 (35%)                         | 87 (21%)                         |                                  |
| Unkown               | 1 (0.2%)                         | 0 (0%)                           | 0 (0%)                           | 0 (0%)                           | 0 (0%)                              | 1 (0.7%)                         | 1 (0.2%)                         | 0 (0%)                           | 0 (0%)                           | 0 (0%)                 | 0 (0%)                        | 3 (0.4%)                            | 1 (0.5%)                         | 117 (55%)                        | 0 (0%)                           |                                  |
| Employment           | 3 (0.6%)                         | 12 (1.2%)                        | 3 (0.5%)                         | 3 (0.7%)                         | 3 (0.6%)                            | 0 (0%)                           | 5 (0.8%)                         | 1 (0.4%)                         | 0 (0%)                           | 3 (0.1%)               | 0 (0%)                        | 3 (0.4%)                            | 0 (0%)                           | 1 (0.5%)                         | 0 (0%)                           |                                  |
| Job seeking          | 16 (3.0%)                        | 33 (3.2%)                        | 65 (11%)                         | 19 (4.2%)                        | 42 (7.8%)                           | 17 (11%)                         | 79 (13%)                         | 1 (0.4%)                         | 8 (4.0%)                         | 116 (5.2%)             | 2 (3.9%)                      | 24 (3.3%)                           | 5 (2.4%)                         | 3 (1.4%)                         | 8 (1.9%)                         |                                  |
| Laid off             | 1 (0.2%)                         | 7 (0.7%)                         | 4 (0.7%)                         | 0 (0%)                           | 1 (0.2%)                            | 2 (1.3%)                         | 5 (0.8%)                         | 0 (0%)                           | 1 (0.5%)                         | 11 (0.5%)              | 0 (0%)                        | 2 (0.3%)                            | 2 (0.9%)                         | 0 (0%)                           | 0 (0%)                           |                                  |
| Not in workforce     | 17 (3.2%)                        | 27 (2.7%)                        | 8 (1.4%)                         | 18 (3.9%)                        | 20 (3.7%)                           | 1 (0.7%)                         | 60 (9.5%)                        | 2 (0.8%)                         | 2 (1.0%)                         | 308 (14%)              | 0 (0%)                        | 8 (1.1%)                            | 3 (1.4%)                         | 6 (2.8%)                         | 0 (0%)                           |                                  |
| Retired              | 14 (2.6%)                        | 19 (1.9%)                        | 0 (0%)                           | 14 (3.1%)                        | 1 (0.2%)                            | 0 (0%)                           | 21 (3.3%)                        | 5 (2.1%)                         | 4 (2.0%)                         | 69 (3.1%)              | 2 (3.9%)                      | 20 (2.8%)                           | 7 (3.3%)                         | 9 (4.2%)                         | 4 (1.0%)                         |                                  |
| Self-employed        | 19 (3.6%)                        | 91 (9.0%)                        | 28 (4.7%)                        | 32 (7.0%)                        | 31 (5.8%)                           | 11 (7.3%)                        | 8 (1.3%)                         | 4 (1.7%)                         | 19 (9.6%)                        | 300 (13%)              | 9 (18%)                       | 63 (8.7%)                           | 9 (4.2%)                         | 8 (3.8%)                         | 39 (9.3%)                        |                                  |
| Student              | 309 (58%)                        | 351 (35%)                        | 200 (34%)                        | 203 (44%)                        | 352 (65%)                           | 15 (10%)                         | 211 (33%)                        | 92 (39%)                         | 95 (48%)                         | 148 (6.6%)             | 12 (24%)                      | 159 (22%)                           | 103 (49%)                        | 41 (19%)                         | 163 (39%)                        |                                  |
| Working (>=40hrs/wk) | 119 (22%)                        | 299 (29%)                        | 192 (33%)                        | 132 (29%)                        | 39 (7.2%)                           | 78 (52%)                         | 124 (20%)                        | 117 (49%)                        | 55 (28%)                         | 988 (44%)              | 13 (25%)                      | 325 (45%)                           | 45 (21%)                         | 106 (50%)                        | 160 (38%)                        |                                  |
| Working (1-39hrs/wk) | 40 (7.5%)                        | 189 (19%)                        | 93 (16%)                         | 39 (8.5%)                        | 52 (9.7%)                           | 26 (17%)                         | 123 (19%)                        | 16 (6.8%)                        | 14 (7.1%)                        | 298 (13%)              | 13 (25%)                      | 122 (17%)                           | 38 (18%)                         | 40 (19%)                         | 45 (11%)                         |                                  |
| Height (m)           | 1.60 (0.08)<br>(1.40 to<br>1.85) | 1.64 (0.09)<br>(1.23 to<br>2.10) | 1.66 (0.14)<br>(1.20 to<br>2.20) | 1.60 (0.10)<br>(1.15 to<br>1.96) | 1.66<br>(0.11)<br>(1.12 to<br>2.00) | 1.68 (0.09)<br>(1.40 to<br>1.93) | 1.65 (0.10)<br>(1.35 to<br>1.95) | 1.64 (0.08)<br>(1.48 to<br>1.85) | 1.62 (0.15)<br>(1.10 to<br>1.96) |                        | 1.67 (0.08)<br>(1.40 to 1.90) | 1.68<br>(0.08)<br>(1.50 to<br>1.85) | 1.63 (0.08)<br>(1.43 to<br>1.85) | 1.67 (0.11)<br>(1.25 to<br>1.95) | 1.65 (0.07)<br>(1.45 to<br>1.80) | 1.59 (0.07)<br>(1.45 to<br>1.84) |
| Unknown              | 1                                | 4                                | 10                               | 3                                | 7                                   | 5                                | 1                                | 0                                | 6                                | 0                      | 0                             | 1                                   | 0                                | 8                                | 0                                |                                  |
| Weight(kg)           | 61 (13) (35<br>to 98)            | 69 (14) (40<br>to 120)           | 63 (11) (25<br>to 100)           | 62 (15) (21<br>to 112)           | 64 (14)<br>(35 to<br>120)           | 68 (12) (32<br>to 97)            | 71 (19) (35<br>to 145)           | 64 (14) (39<br>to 103)           | 66 (18) (40<br>to 140)           | 65 (13) (32 to<br>137) | 68 (13)<br>(49 to<br>100)     | 62 (14) (37<br>to 108)              | 73 (18) (16 to<br>160)           | 73 (17) (40<br>to 134)           | 54 (9) (38<br>to 88)             |                                  |
| Unknown              | 0                                | 2                                | 3                                | 0                                | 0                                   | 0                                | 1                                | 0                                | 2                                | 0                      | 0                             | 2                                   | 1                                | 8                                | 0                                |                                  |
| BMI                  | 24.0 (4.6)<br>(14.3 to<br>39.4)  | 25.6 (4.3)<br>(13.8 to<br>39.4)  | 23.2 (5.3)<br>(11.2 to<br>51.7)  | 24.3 (5.5)<br>(7.5 to 47.4)      | 23.2 (4.7)<br>(10.8 to<br>38.3)     | 24.0 (3.7)<br>(12.9 to<br>32.9)  | 26.1 (5.7)<br>(12.9 to<br>53.5)  | 23.5 (4.3)<br>(15.2 to<br>36.9)  | 25.8 (7.7)<br>(14.3 to<br>56.7)  |                        | 23.2 (3.4)<br>(13.3 to 45.7)  | 24.2<br>(3.6)<br>(18.0 to<br>36.3)  | 23.1 (4.3)<br>(14.1 to<br>38.9)  | 26.3 (6.4)<br>(6.2 to 50.6)      | 26.8 (6.2)<br>(16.9 to<br>50.2)  | 21.2 (2.7)<br>(14.7 to<br>32.9)  |
| Unknown              | 1                                | 6                                | 11                               | 3                                | 7                                   | 5                                | 1                                | 0                                | 7                                | 0                      | 0                             | 2                                   | 1                                | 11                               | 0                                |                                  |
| BMI classification   |                                  |                                  |                                  |                                  |                                     |                                  |                                  |                                  |                                  |                        |                               |                                     |                                  |                                  |                                  |                                  |
| Severely underweight | 14 (2.6%)                        | 4 (0.4%)                         | 30 (5.2%)                        | 11 (2.4%)                        | 26 (4.9%)                           | 3 (2.1%)                         | 7 (1.1%)                         | 2 (0.8%)                         | 4 (2.1%)                         | 11 (0.5%)              | 0 (0%)                        | 13 (1.8%)                           | 3 (1.4%)                         | 0 (0%)                           | 7 (1.7%)                         |                                  |



|                                           |                    |                    |                   |                       |                |                |                   |                    |                       |                 |                       |                   |                       |                   |                   |  |
|-------------------------------------------|--------------------|--------------------|-------------------|-----------------------|----------------|----------------|-------------------|--------------------|-----------------------|-----------------|-----------------------|-------------------|-----------------------|-------------------|-------------------|--|
| Underweight                               | 37 (6.9%)          | 28 (2.8%)          | 49 (8.5%)         | 35 (7.7%)             | 50 (9.4%)      | 1 (0.7%)       | 33 (5.2%)         | 21 (8.9%)          | 19 (9.9%)             | 108 (4.8%)      | 2 (3.9%)              | 60 (8.3%)         | 7 (3.3%)              | 2 (1.0%)          | 53 (13%)          |  |
| Normal weight                             | 199 (37%)          | 440 (44%)          | 343 (59%)         | 175 (39%)             | 279 (53%)      | 90 (62%)       | 155 (25%)         | 99 (42%)           | 80 (42%)              | 1,032 (46%)     | 32 (63%)              | 338 (47%)         | 90 (43%)              | 92 (46%)          | 264 (63%)         |  |
| Overweight                                | 85 (16%)           | 378 (37%)          | 101 (17%)         | 63 (14%)              | 124 (23%)      | 42 (29%)       | 95 (15%)          | 35 (15%)           | 45 (24%)              | 485 (22%)       | 14 (27%)              | 116 (16%)         | 72 (34%)              | 61 (30%)          | 58 (14%)          |  |
| Obesity                                   | 199 (37%)          | 160 (16%)          | 56 (9.7%)         | 170 (37%)             | 52 (9.8%)      | 9 (6.2%)       | 340 (54%)         | 80 (34%)           | 43 (23%)              | 602 (27%)       | 3 (5.9%)              | 194 (27%)         | 39 (18%)              | 47 (23%)          | 37 (8.8%)         |  |
| Unknown                                   | 1                  | 6                  | 11                | 3                     | 7              | 5              | 1                 | 0                  | 7                     | 0               | 0                     | 2                 | 1                     | 11                | 0                 |  |
| Pregnant                                  |                    |                    |                   |                       |                |                |                   |                    |                       |                 |                       |                   |                       |                   |                   |  |
| Not applicable                            | 166 (31%)          | 347 (34%)          | 255 (43%)         | 124 (27%)             | 193 (36%)      | 106 (71%)      | 259 (41%)         | 66 (28%)           | 61 (31%)              | 1,110 (50%)     | 16 (31%)              | 192 (27%)         | 56 (26%)              | 22 (10%)          | 90 (21%)          |  |
| No                                        | 363 (68%)          | 665 (65%)          | 320 (54%)         | 330 (72%)             | 342 (64%)      | 40 (27%)       | 356 (56%)         | 170 (72%)          | 136 (69%)             | 1,119 (50%)     | 35 (69%)              | 527 (73%)         | 156 (74%)             | 187 (88%)         | 317 (76%)         |  |
| Yes                                       | 6 (1.1%)           | 4 (0.4%)           | 15 (2.5%)         | 3 (0.7%)              | 3 (0.6%)       | 4 (2.7%)       | 16 (2.5%)         | 1 (0.4%)           | 1 (0.5%)              | 9 (0.4%)        | 0 (0%)                | 4 (0.6%)          | 0 (0%)                | 4 (1.9%)          | 12 (2.9%)         |  |
| Gestational week                          |                    |                    |                   |                       |                |                |                   |                    |                       |                 |                       |                   |                       |                   |                   |  |
|                                           | 25 (12) (12 to 35) | 24 (NA) (24 to 24) | 27 (8) (17 to 34) | NA (NA) (Inf to -Inf) | 7 (1) (6 to 8) | 6 (3) (4 to 9) | 15 (11) (5 to 30) | 10 (NA) (10 to 10) | NA (NA) (Inf to -Inf) | 9 (2) (5 to 10) | NA (NA) (Inf to -Inf) | 18 (15) (6 to 36) | NA (NA) (Inf to -Inf) | 29 (4) (25 to 34) | 31 (8) (15 to 36) |  |
| Unknown                                   | 532                | 1,015              | 586               | 457                   | 536            | 147            | 626               | 236                | 198                   | 2,229           | 51                    | 719               | 212                   | 209               | 413               |  |
| Regular medical follow-up before COVID-19 |                    |                    |                   |                       |                |                |                   |                    |                       |                 |                       |                   |                       |                   |                   |  |
| NA                                        | 0 (0%)             | 0 (0%)             | 0 (0%)            | 0 (0%)                | 0 (0%)         | 0 (0%)         | 0 (0%)            | 0 (0%)             | 0 (0%)                | 0 (0%)          | 0 (0%)                | 0 (0%)            | 0 (0%)                | 2 (0.9%)          | 0 (0%)            |  |
| No                                        | 436 (81%)          | 702 (69%)          | 469 (79%)         | 344 (75%)             | 450 (84%)      | 139 (93%)      | 448 (71%)         | 187 (79%)          | 151 (76%)             | 1,372 (61%)     | 35 (69%)              | 502 (69%)         | 154 (73%)             | 88 (41%)          | 62 (15%)          |  |
| Yes                                       | 99 (19%)           | 314 (31%)          | 121 (21%)         | 113 (25%)             | 88 (16%)       | 11 (7.3%)      | 183 (29%)         | 50 (21%)           | 47 (24%)              | 866 (39%)       | 16 (31%)              | 221 (31%)         | 58 (27%)              | 123 (58%)         | 357 (85%)         |  |
| Practising healthcare professional        |                    |                    |                   |                       |                |                |                   |                    |                       |                 |                       |                   |                       |                   |                   |  |
| NA                                        | 0 (0%)             | 0 (0%)             | 0 (0%)            | 0 (0%)                | 0 (0%)         | 0 (0%)         | 0 (0%)            | 0 (0%)             | 0 (0%)                | 0 (0%)          | 0 (0%)                | 0 (0%)            | 0 (0%)                | 0 (0%)            | 0 (0%)            |  |
| No                                        | 290 (54%)          | 425 (42%)          | 276 (47%)         | 267 (58%)             | 357 (66%)      | 71 (47%)       | 466 (74%)         | 124 (52%)          | 133 (67%)             | 2,150 (96%)     | 42 (82%)              | 634 (88%)         | 162 (76%)             | 81 (38%)          | 229 (55%)         |  |
| Yes                                       | 245 (46%)          | 591 (58%)          | 314 (53%)         | 190 (42%)             | 181 (34%)      | 79 (53%)       | 165 (26%)         | 113 (48%)          | 65 (33%)              | 88 (3.9%)       | 9 (18%)               | 89 (12%)          | 50 (24%)              | 132 (62%)         | 190 (45%)         |  |
| Number of children less than 18 years old |                    |                    |                   |                       |                |                |                   |                    |                       |                 |                       |                   |                       |                   |                   |  |
| No                                        | 398 (74%)          | 802 (79%)          | 468 (79%)         | 352 (77%)             | 484 (90%)      | 87 (58%)       | 390 (62%)         | 164 (69%)          | 163 (82%)             | 1,634 (73%)     | 33 (65%)              | 631 (87%)         | 163 (77%)             | 147 (69%)         | 242 (58%)         |  |
| Yes                                       | 137 (26%)          | 214 (21%)          | 122 (21%)         | 105 (23%)             | 54 (10%)       | 63 (42%)       | 241 (38%)         | 73 (31%)           | 35 (18%)              | 604 (27%)       | 18 (35%)              | 92 (13%)          | 49 (23%)              | 66 (31%)          | 177 (42%)         |  |

|                                  |                 |                      |                    |                      |                       |                     |                       |                     |                      |                     |                      |                       |                    |                       |                       |
|----------------------------------|-----------------|----------------------|--------------------|----------------------|-----------------------|---------------------|-----------------------|---------------------|----------------------|---------------------|----------------------|-----------------------|--------------------|-----------------------|-----------------------|
| Number of children aged above 18 | 0.58 (1.17)     | 0.34 (0.84)          | 0.48 (1.21)        | 0.36 (0.79)          | 0.26 (0.90)           | 0.83 (1.20)         | 0.99 (1.55)           | 0.61 (1.02)         | 0.30 (0.71)          | 0.42 (0.76)         | 0.63 (0.94)          | 0.18 (0.52)           | 0.41 (0.90)        | 0.49 (0.83)           | 0.76 (0.96)           |
|                                  | (0.00 to 8.00)  | (0.00 to 11.00)      | (0.00 to 10.00)    | (0.00 to 4.00)       | (0.00 to 6.00)        | (0.00 to 5.00)      | (0.00 to 7.00)        | (0.00 to 4.00)      | (0.00 to 3.00)       | (0.00 to 5.00)      | (0.00 to 3.00)       | (0.00 to 4.00)        | (0.00 to 6.00)     | (0.00 to 4.00)        | (0.00 to 4.00)        |
| Unknown                          | 0               | 11                   | 3                  | 2                    | 3                     | 0                   | 17                    | 0                   | 0                    | 0                   | 0                    | 2                     | 1                  | 1                     | 0                     |
| Number of people lived with      | 5.07 (2.17)     | 3.86 (1.83)          | 4.26 (2.61)        | 4.97 (2.25)          | 6.59 (2.60)           | 3.83 (2.21)         | 6.25 (2.76)           | 4.21 (1.47)         | 4.33 (2.16)          | 3.05 (1.15)         | 3.35 (1.38)          | 3.35 (1.91)           | 3.14 (1.49)        | 2.67 (1.31)           | 4.31 (2.03)           |
|                                  | (1.00 to 16.00) | (1.00 to 14.00)      | (1.00 to 23.00)    | (1.00 to 14.00)      | (1.00 to 18.00)       | (1.00 to 10.00)     | (1.00 to 21.00)       | (1.00 to 10.00)     | (1.00 to 12.00)      | (1.00 to 7.00)      | (1.00 to 6.00)       | (1.00 to 18.00)       | (1.00 to 8.00)     | (1.00 to 8.00)        | (1.00 to 12.00)       |
| Unknown                          | 2               | 2                    | 4                  | 5                    | 35                    | 0                   | 32                    | 0                   | 1                    | 0                   | 0                    | 1                     | 0                  | 10                    | 6                     |
| Perceived social rank            | 3.49 (0.81)     | 3.01 (0.64)          | 2.99 (0.90)        | 3.27 (0.70)          | 3.17 (1.03)           | 2.83 (0.75)         | 3.46 (0.97)           | 3.32 (0.71)         | 3.19 (1.01)          | 2.95 (0.70)         | 3.00 (0.66)          | 3.84 (0.87)           | 3.34 (0.77)        | 3.77 (0.76)           | 3.23 (0.72)           |
|                                  | (1.00 to 5.00)  | (1.00 to 5.00)       | (1.00 to 5.00)     | (1.00 to 5.00)       | (1.00 to 5.00)        | (1.00 to 5.00)      | (1.00 to 5.00)        | (1.00 to 5.00)      | (1.00 to 5.00)       | (1.00 to 5.00)      | (1.00 to 5.00)       | (1.00 to 5.00)        | (1.00 to 5.00)     | (1.00 to 5.00)        | (1.00 to 5.00)        |
| Unknown                          | 0               | 0                    | 0                  | 0                    | 0                     | 0                   | 0                     | 0                   | 0                    | 0                   | 0                    | 0                     | 0                  | 2                     | 0                     |
| House size                       | 136 (127)       | 125 (99) (10 to 500) | 68 (80) (1 to 555) | 120 (107) (1 to 561) | 243 (145) (10 to 500) | 98 (45) (12 to 249) | 247 (155) (10 to 555) | 115 (71) (1 to 500) | 146 (124) (1 to 550) | 31 (13) (10 to 100) | 110 (62) (25 to 300) | 134 (119) (10 to 540) | 98 (89) (1 to 500) | 195 (109) (20 to 560) | 168 (141) (10 to 650) |
| Unknown                          | 17              | 85                   | 19                 | 20                   | 226                   | 1                   | 296                   | 3                   | 8                    | 1                   | 0                    | 56                    | 22                 | 42                    | 19                    |

<sup>1</sup>n (%); Mean (SD) (Range)

**eTable 3. Weighted demographic summary by country.**

| Characteristic                  | Australia, N<br>= 639 <sup>1</sup> | Brazil, N =<br>553 <sup>1</sup> | Burundi, N =<br>369 <sup>1</sup> | Canada, N =<br>368 <sup>1</sup> | Chile, N =<br>342 <sup>1</sup> | Egypt, N =<br>461 <sup>1</sup> | Guatemala,<br>N = 229 <sup>1</sup> | Hong Kong,<br>N = 2,127 <sup>1</sup> | India, N =<br>529 <sup>1</sup> | Indonesia, N<br>= 405 <sup>1</sup> | Italy, N =<br>203 <sup>1</sup> | Lebanon, N =<br>440 <sup>1</sup> | Libya, N =<br>612 <sup>1</sup> | Macau, N =<br>233 <sup>1</sup> | Mainland<br>China, N =<br>667 <sup>1</sup> |
|---------------------------------|------------------------------------|---------------------------------|----------------------------------|---------------------------------|--------------------------------|--------------------------------|------------------------------------|--------------------------------------|--------------------------------|------------------------------------|--------------------------------|----------------------------------|--------------------------------|--------------------------------|--------------------------------------------|
| <b>Age</b>                      |                                    |                                 |                                  |                                 |                                |                                |                                    |                                      |                                |                                    |                                |                                  |                                |                                |                                            |
| 18-24                           | 59 (9.2%)                          | 75 (13%)                        | 80 (22%)                         | 40 (11%)                        | 34 (10.0%)                     | 71 (15%)                       | 41 (18%)                           | 154 (7.2%)                           | 80 (15%)                       | 69 (17%)                           | 12 (6.0%)                      | 59 (13%)                         | 91 (15%)                       | 19 (8.3%)                      | 101 (15%)                                  |
| 25-29                           | 64 (10.0%)                         | 74 (13%)                        | 70 (19%)                         | 30 (8.1%)                       | 39 (11%)                       | 71 (15%)                       | 37 (16%)                           | 176 (8.3%)                           | 73 (14%)                       | 69 (17%)                           | 13 (6.4%)                      | 51 (11%)                         | 95 (15%)                       | 22 (9.5%)                      | 83 (12%)                                   |
| 30-34                           | 63 (9.9%)                          | 68 (12%)                        | 54 (15%)                         | 30 (8.3%)                       | 38 (11%)                       | 63 (14%)                       | 31 (14%)                           | 199 (9.4%)                           | 66 (12%)                       | 67 (17%)                           | 14 (6.7%)                      | 43 (9.9%)                        | 94 (15%)                       | 33 (14%)                       | 76 (11%)                                   |
| 35-39                           | 60 (9.3%)                          | 60 (11%)                        | 38 (10%)                         | 30 (8.1%)                       | 34 (9.9%)                      | 56 (12%)                       | 26 (11%)                           | 197 (9.3%)                           | 60 (11%)                       | 66 (16%)                           | 15 (7.3%)                      | 40 (9.1%)                        | 91 (15%)                       | 29 (12%)                       | 90 (13%)                                   |
| 40-44                           | 53 (8.3%)                          | 56 (10%)                        | 30 (8.2%)                        | 30 (8.0%)                       | 32 (9.3%)                      | 45 (9.7%)                      | 21 (9.4%)                          | 197 (9.2%)                           | 54 (10%)                       | 31 (7.7%)                          | 17 (8.5%)                      | 37 (8.3%)                        | 77 (13%)                       | 22 (9.6%)                      | 100 (15%)                                  |
| 45-49                           | 56 (8.8%)                          | 51 (9.3%)                       | 26 (6.9%)                        | 31 (8.4%)                       | 30 (8.8%)                      | 38 (8.2%)                      | 18 (7.7%)                          | 196 (9.2%)                           | 47 (9.0%)                      | 57 (14%)                           | 20 (9.7%)                      | 36 (8.3%)                        | 60 (9.8%)                      | 22 (9.6%)                      | 94 (14%)                                   |
| 50-54                           | 51 (8.0%)                          | 44 (7.9%)                       | 22 (5.9%)                        | 35 (9.5%)                       | 29 (8.5%)                      | 35 (7.5%)                      | 14 (6.1%)                          | 222 (10%)                            | 39 (7.5%)                      | 25 (6.2%)                          | 20 (9.9%)                      | 39 (8.9%)                        | 42 (6.9%)                      | 21 (9.0%)                      | 58 (8.7%)                                  |
| 55-59                           | 52 (8.1%)                          | 36 (6.5%)                       | 19 (5.0%)                        | 34 (9.3%)                       | 27 (7.9%)                      | 28 (6.1%)                      | 11 (4.9%)                          | 215 (10%)                            | 32 (6.0%)                      | 21 (5.2%)                          | 19 (9.3%)                      | 34 (7.8%)                        | 29 (4.7%)                      | 24 (10%)                       | 66 (10.0%)                                 |
| 60-64                           | 46 (7.3%)                          | 28 (5.1%)                       | 12 (3.2%)                        | 30 (8.1%)                       | 23 (6.8%)                      | 23 (5.0%)                      | 9 (3.9%)                           | 171 (8.0%)                           | 25 (4.8%)                      | 0 (0%)                             | 16 (7.9%)                      | 29 (6.5%)                        | 9 (1.5%)                       | 20 (8.8%)                      | 0 (0%)                                     |
| >=65                            | 135 (21%)                          | 61 (11%)                        | 18 (4.9%)                        | 78 (21%)                        | 56 (16%)                       | 32 (6.9%)                      | 21 (9.4%)                          | 401 (19%)                            | 53 (10.0%)                     | 0 (0%)                             | 57 (28%)                       | 72 (16%)                         | 24 (3.9%)                      | 19 (8.3%)                      | 0 (0%)                                     |
| <b>Gender</b>                   |                                    |                                 |                                  |                                 |                                |                                |                                    |                                      |                                |                                    |                                |                                  |                                |                                |                                            |
| Female                          | 324 (51%)                          | 287 (52%)                       | 178 (48%)                        | 186 (50%)                       | 173 (51%)                      | 224 (49%)                      | 117 (51%)                          | 1,171 (55%)                          | 260 (49%)                      | 184 (45%)                          | 105 (52%)                      | 207 (47%)                        | 287 (47%)                      | 133 (57%)                      | 327 (49%)                                  |
| Male                            | 312 (49%)                          | 266 (48%)                       | 172 (47%)                        | 174 (47%)                       | 164 (48%)                      | 237 (51%)                      | 107 (47%)                          | 955 (45%)                            | 269 (51%)                      | 222 (55%)                          | 98 (48%)                       | 233 (53%)                        | 326 (53%)                      | 99 (43%)                       | 334 (50%)                                  |
| Non-binary                      | 3 (0.5%)                           | 0 (<0.1%)                       | 18 (5.0%)                        | 9 (2.3%)                        | 5 (1.4%)                       | 0 (0%)                         | 4 (1.9%)                           | 1 (<0.1%)                            | 0 (0%)                         | 0 (0%)                             | 0 (0%)                         | 0 (0%)                           | 0 (0%)                         | 0 (0%)                         | 6 (0.9%)                                   |
| <b>Marital</b>                  |                                    |                                 |                                  |                                 |                                |                                |                                    |                                      |                                |                                    |                                |                                  |                                |                                |                                            |
| Single                          | 188 (29%)                          | 197 (36%)                       | 155 (42%)                        | 89 (24%)                        | 139 (41%)                      | 130 (28%)                      | 116 (50%)                          | 559 (26%)                            | 147 (28%)                      | 158 (39%)                          | 35 (17%)                       | 125 (28%)                        | 268 (44%)                      | 70 (30%)                       | 200 (30%)                                  |
| Married/Cohabitation/Common-law | 350 (55%)                          | 306 (55%)                       | 190 (51%)                        | 239 (65%)                       | 144 (42%)                      | 306 (66%)                      | 109 (48%)                          | 1,411 (66%)                          | 333 (63%)                      | 248 (61%)                          | 142 (70%)                      | 269 (61%)                        | 324 (53%)                      | 154 (66%)                      | 411 (62%)                                  |
| Separated/Divorced/Widowed      | 100 (16%)                          | 50 (9.1%)                       | 24 (6.5%)                        | 39 (11%)                        | 59 (17%)                       | 25 (5.4%)                      | 5 (2.0%)                           | 156 (7.3%)                           | 49 (9.2%)                      | 0 (0%)                             | 26 (13%)                       | 46 (10%)                         | 20 (3.3%)                      | 9 (3.9%)                       | 56 (8.3%)                                  |
| Unknown                         | 1                                  | 0                               | 0                                | 0                               | 0                              | 0                              | 0                                  | 0                                    | 0                              | 0                                  | 0                              | 0                                | 0                              | 0                              | 0                                          |
| <b>Education</b>                |                                    |                                 |                                  |                                 |                                |                                |                                    |                                      |                                |                                    |                                |                                  |                                |                                |                                            |
| Primary or below                | 0 (0%)                             | 2 (0.3%)                        | 133 (36%)                        | 0 (0.1%)                        | 5 (1.4%)                       | 1 (0.1%)                       | 0 (0%)                             | 371 (17%)                            | 74 (14%)                       | 0 (0%)                             | 4 (2.2%)                       | 37 (8.4%)                        | 6 (1.0%)                       | 0 (0%)                         | 7 (1.1%)                                   |
| Secondary                       | 163 (27%)                          | 57 (10%)                        | 178 (48%)                        | 51 (14%)                        | 38 (11%)                       | 23 (5.0%)                      | 30 (13%)                           | 1,072 (50%)                          | 63 (12%)                       | 0 (0%)                             | 11 (5.3%)                      | 49 (11%)                         | 61 (10%)                       | 12 (5.1%)                      | 134 (20%)                                  |

|                           |                     |                     |                   |                     |                     |                     |                     |                     |                     |                     |                     |                     |                     |                     |                     |  |
|---------------------------|---------------------|---------------------|-------------------|---------------------|---------------------|---------------------|---------------------|---------------------|---------------------|---------------------|---------------------|---------------------|---------------------|---------------------|---------------------|--|
| Associate degree          | 119 (20%)           | 9 (1.7%)            | 14 (3.7%)         | 10 (2.8%)           | 4 (1.2%)            | 16 (3.4%)           | 2 (0.7%)            | 158 (7.4%)          | 44 (8.4%)           | 73 (18%)            | 66 (32%)            | 40 (9.2%)           | 51 (8.4%)           | 114 (49%)           | 17 (2.6%)           |  |
| College                   | 179 (30%)           | 53 (9.5%)           | 13 (3.6%)         | 104 (28%)           | 128 (37%)           | 45 (9.8%)           | 62 (27%)            | 143 (6.7%)          | 65 (13%)            | 27 (6.6%)           | 13 (6.2%)           | 43 (9.7%)           | 70 (11%)            | 9 (3.8%)            | 176 (27%)           |  |
| Bachelor                  | 79 (13%)            | 144 (26%)           | 24 (6.6%)         | 96 (26%)            | 47 (14%)            | 201 (44%)           | 44 (19%)            | 342 (16%)           | 102 (20%)           | 195 (48%)           | 17 (8.1%)           | 127 (29%)           | 284 (46%)           | 78 (34%)            | 158 (24%)           |  |
| Graduate                  | 55 (9.2%)           | 288 (52%)           | 6 (1.7%)          | 107 (29%)           | 119 (35%)           | 175 (38%)           | 92 (40%)            | 41 (1.9%)           | 173 (33%)           | 110 (27%)           | 93 (46%)            | 144 (33%)           | 139 (23%)           | 19 (8.2%)           | 163 (25%)           |  |
| Unknown                   | 44                  | 0                   | 0                 | 0                   | 0                   | 0                   | 0                   | 0                   | 7                   | 0                   | 0                   | 0                   | 0                   | 0                   | 12                  |  |
| <b>Employment</b>         |                     |                     |                   |                     |                     |                     |                     |                     |                     |                     |                     |                     |                     |                     |                     |  |
| Job seeking               | 84 (13%)            | 9 (1.7%)            | 18 (5.0%)         | 12 (3.3%)           | 24 (7.1%)           | 17 (3.8%)           | 6 (2.6%)            | 60 (2.8%)           | 27 (5.0%)           | 10 (2.4%)           | 6 (2.9%)            | 38 (8.7%)           | 35 (5.7%)           | 1 (0.5%)            | 52 (7.8%)           |  |
| Laid off                  | 44 (6.9%)           | 1 (0.2%)            | 13 (3.6%)         | 8 (2.0%)            | 0 (0%)              | 0 (0%)              | 3 (1.2%)            | 36 (1.7%)           | 0 (<0.1%)           | 0 (0%)              | 0 (0%)              | 7 (1.5%)            | 1 (0.2%)            | 0 (0%)              | 22 (3.2%)           |  |
| Not in workforce          | 44 (6.9%)           | 8 (1.4%)            | 3 (0.9%)          | 34 (9.2%)           | 14 (4.0%)           | 34 (7.3%)           | 0 (0%)              | 231 (11%)           | 95 (18%)            | 3 (0.7%)            | 7 (3.6%)            | 63 (14%)            | 34 (5.5%)           | 3 (1.2%)            | 18 (2.8%)           |  |
| Retired                   | 58 (9.0%)           | 63 (11%)            | 3 (0.8%)          | 91 (25%)            | 52 (15%)            | 48 (10%)            | 12 (5.1%)           | 437 (21%)           | 22 (4.3%)           | 0 (0%)              | 62 (30%)            | 5 (1.2%)            | 24 (3.9%)           | 23 (9.7%)           | 35 (5.3%)           |  |
| Self-employed             | 7 (1.1%)            | 63 (11%)            | 179 (48%)         | 20 (5.4%)           | 26 (7.7%)           | 68 (15%)            | 34 (15%)            | 37 (1.7%)           | 78 (15%)            | 73 (18%)            | 21 (10%)            | 108 (25%)           | 58 (9.4%)           | 14 (6.2%)           | 40 (6.1%)           |  |
| Student                   | 39 (6.1%)           | 83 (15%)            | 82 (22%)          | 25 (6.9%)           | 50 (15%)            | 64 (14%)            | 57 (25%)            | 127 (6.0%)          | 92 (17%)            | 90 (22%)            | 12 (6.1%)           | 49 (11%)            | 114 (19%)           | 16 (6.7%)           | 102 (15%)           |  |
| Working (>=40hrs/wk)      | 66 (10%)            | 239 (43%)           | 22 (6.1%)         | 82 (22%)            | 143 (42%)           | 129 (28%)           | 78 (34%)            | 885 (42%)           | 158 (30%)           | 112 (28%)           | 46 (22%)            | 77 (18%)            | 111 (18%)           | 89 (38%)            | 280 (42%)           |  |
| Working (1-39hrs/wk)      | 297 (46%)           | 87 (16%)            | 47 (13%)          | 97 (26%)            | 32 (9.4%)           | 100 (22%)           | 40 (17%)            | 313 (15%)           | 57 (11%)            | 117 (29%)           | 49 (24%)            | 92 (21%)            | 236 (39%)           | 87 (37%)            | 118 (18%)           |  |
| <b>Height (m)</b>         |                     |                     |                   |                     |                     |                     |                     |                     |                     |                     |                     |                     |                     |                     |                     |  |
|                           | 1.70 (0.08)         | 1.69 (0.11)         | 1.63 (0.06)       | 1.70 (0.12)         | 1.67 (0.09)         | 1.68 (0.10)         | 1.66 (0.10)         | 1.64 (0.08)         | 1.63 (0.10)         | 1.62 (0.07)         | 1.70 (0.09)         | 1.68 (0.09)         | 1.66 (0.14)         | 1.65 (0.08)         | 1.67 (0.08)         |  |
|                           | (1.50 to 1.96)      | (1.16 to 1.94)      | (1.52 to 1.90)    | (1.28 to 2.11)      | (1.40 to 1.90)      | (1.30 to 1.97)      | (1.44 to 1.98)      | (1.37 to 1.98)      | (1.43 to 1.96)      | (1.45 to 1.84)      | (1.50 to 1.94)      | (1.47 to 1.98)      | (1.20 to 2.00)      | (1.49 to 1.98)      | (1.30 to 1.86)      |  |
| Unknown                   | 14                  | 0                   | 1                 | 5                   | 0                   | 0                   | 1                   | 1                   | 4                   | 0                   | 0                   | 1                   | 3                   | 0                   | 5                   |  |
| <b>Weight(kg)</b>         |                     |                     |                   |                     |                     |                     |                     |                     |                     |                     |                     |                     |                     |                     |                     |  |
|                           | 74 (14) (27 to 130) | 74 (16) (37 to 120) | 60 (7) (45 to 89) | 79 (19) (31 to 127) | 75 (13) (41 to 113) | 80 (17) (40 to 160) | 69 (14) (39 to 110) | 62 (10) (39 to 117) | 67 (12) (34 to 104) | 64 (13) (33 to 103) | 72 (16) (45 to 122) | 75 (15) (40 to 140) | 76 (18) (36 to 150) | 63 (12) (30 to 110) | 66 (14) (35 to 135) |  |
| Unknown                   | 8                   | 0                   | 0                 | 26                  | 0                   | 0                   | 1                   | 0                   | 5                   | 0                   | 0                   | 0                   | 0                   | 0                   | 5                   |  |
| <b>BMI</b>                |                     |                     |                   |                     |                     |                     |                     |                     |                     |                     |                     |                     |                     |                     |                     |  |
|                           | 25.6 (4.2)          | 26.0 (4.5)          | 22.4 (2.2)        | 27.0 (5.2)          | 26.7 (3.8)          | 28.4 (5.3)          | 24.8 (3.9)          | 23.1 (3.0)          | 25.1 (3.7)          | 24.1 (4.5)          | 24.9 (4.4)          | 26.6 (4.3)          | 27.9 (7.5)          | 22.9 (3.5)          | 23.5 (4.2)          |  |
|                           | (11.7 to 45.8)      | (15.6 to 42.0)      | (15.5 to 34.0)    | (13.5 to 43.8)      | (17.6 to 44.4)      | (15.4 to 62.4)      | (13.9 to 37.1)      | (13.4 to 38.2)      | (14.5 to 36.1)      | (14.1 to 40.3)      | (17.3 to 38.9)      | (13.8 to 48.4)      | (12.9 to 52.1)      | (11.0 to 37.5)      | (12.1 to 48.4)      |  |
| Unknown                   | 16                  | 0                   | 1                 | 28                  | 0                   | 0                   | 2                   | 1                   | 5                   | 0                   | 0                   | 1                   | 3                   | 0                   | 5                   |  |
| <b>BMI classification</b> |                     |                     |                   |                     |                     |                     |                     |                     |                     |                     |                     |                     |                     |                     |                     |  |
| Severely underweight      | 6 (1.0%)            | 2 (0.3%)            | 4 (1.0%)          | 1 (0.4%)            | 0 (0%)              | 1 (0.2%)            | 5 (2.0%)            | 7 (0.3%)            | 3 (0.5%)            | 3 (0.7%)            | 0 (0%)              | 0 (<0.1%)           | 5 (0.7%)            | 5 (2.3%)            | 4 (0.6%)            |  |
| Underweight               | 16 (2.6%)           | 12 (2.2%)           | 3 (0.9%)          | 5 (1.4%)            | 2 (0.5%)            | 6 (1.2%)            | 2 (0.8%)            | 101 (4.7%)          | 12 (2.4%)           | 36 (8.9%)           | 4 (1.8%)            | 10 (2.2%)           | 12 (2.0%)           | 17 (7.5%)           | 41 (6.2%)           |  |
| Normal weight             | 260 (42%)           | 238 (43%)           | 336 (91%)         | 120 (35%)           | 105 (31%)           | 51 (11%)            | 115 (51%)           | 868 (41%)           | 134 (26%)           | 144 (35%)           | 114 (56%)           | 76 (17%)            | 221 (36%)           | 86 (37%)            | 264 (40%)           |  |

|                                           |                            |                            |                            |                            |                            |                            |                            |                            |                            |                            |                            |                            |                            |                            |                            |  |
|-------------------------------------------|----------------------------|----------------------------|----------------------------|----------------------------|----------------------------|----------------------------|----------------------------|----------------------------|----------------------------|----------------------------|----------------------------|----------------------------|----------------------------|----------------------------|----------------------------|--|
| Overweight                                | 248 (40%)                  | 194 (35%)                  | 18 (4.9%)                  | 128 (38%)                  | 171 (50%)                  | 68 (15%)                   | 84 (37%)                   | 634 (30%)                  | 106 (20%)                  | 59 (15%)                   | 63 (31%)                   | 77 (18%)                   | 206 (34%)                  | 62 (27%)                   | 172 (26%)                  |  |
| Obesity                                   | 93 (15%)                   | 108 (19%)                  | 7 (1.8%)                   | 85 (25%)                   | 65 (19%)                   | 336 (73%)                  | 21 (9.2%)                  | 516 (24%)                  | 268 (51%)                  | 164 (40%)                  | 23 (11%)                   | 276 (63%)                  | 165 (27%)                  | 62 (27%)                   | 182 (27%)                  |  |
| Unknown                                   | 16                         | 0                          | 1                          | 28                         | 0                          | 0                          | 2                          | 1                          | 5                          | 0                          | 0                          | 1                          | 3                          | 0                          | 5                          |  |
| Pregnant                                  |                            |                            |                            |                            |                            |                            |                            |                            |                            |                            |                            |                            |                            |                            |                            |  |
| Not applicable                            | 313 (49%)                  | 266 (48%)                  | 172 (47%)                  | 174 (47%)                  | 164 (48%)                  | 254 (55%)                  | 107 (47%)                  | 955 (45%)                  | 269 (51%)                  | 222 (55%)                  | 98 (48%)                   | 238 (54%)                  | 326 (53%)                  | 99 (43%)                   | 335 (50%)                  |  |
| No                                        | 321 (50%)                  | 283 (51%)                  | 164 (44%)                  | 185 (50%)                  | 176 (52%)                  | 207 (45%)                  | 119 (52%)                  | 1,165 (55%)                | 259 (49%)                  | 176 (43%)                  | 104 (51%)                  | 200 (45%)                  | 273 (45%)                  | 106 (45%)                  | 257 (39%)                  |  |
| Yes                                       | 5 (0.8%)                   | 4 (0.8%)                   | 33 (9.0%)                  | 9 (2.5%)                   | 1 (0.4%)                   | 0 (0%)                     | 3 (1.1%)                   | 7 (0.3%)                   | 1 (0.1%)                   | 8 (2.0%)                   | 0 (0.2%)                   | 3 (0.6%)                   | 14 (2.2%)                  | 28 (12%)                   | 75 (11%)                   |  |
| Gestational week                          | 20 (12) (6 to 40)          | 7 (0) (6 to 7)             | 5 (1) (3 to 7)             | 25 (11) (4 to 39)          | 30 (0) (30 to 30)          | 0 (0) (Inf to -Inf)        | 0 (0) (Inf to -Inf)        | 25 (9) (15 to 40)          | 0 (0) (Inf to -Inf)        | 11 (4) (8 to 32)           | 12 (0) (12 to 12)          | 17 (11) (6 to 30)          | 24 (11) (9 to 36)          | 38 (7) (5 to 40)           | 35 (7) (4 to 41)           |  |
| Unknown                                   | 634                        | 552                        | 354                        | 359                        | 341                        | 461                        | 229                        | 2,120                      | 529                        | 397                        | 203                        | 437                        | 607                        | 205                        | 643                        |  |
| Regular medical follow-up before COVID-19 |                            |                            |                            |                            |                            |                            |                            |                            |                            |                            |                            |                            |                            |                            |                            |  |
| No                                        | 435 (68%)                  | 374 (68%)                  | 340 (92%)                  | 166 (45%)                  | 199 (58%)                  | 316 (69%)                  | 157 (69%)                  | 1,363 (64%)                | 320 (61%)                  | 261 (65%)                  | 53 (26%)                   | 223 (51%)                  | 427 (70%)                  | 156 (67%)                  | 570 (85%)                  |  |
| Yes                                       | 204 (32%)                  | 179 (32%)                  | 29 (7.8%)                  | 202 (55%)                  | 143 (42%)                  | 145 (31%)                  | 72 (31%)                   | 764 (36%)                  | 209 (39%)                  | 144 (35%)                  | 150 (74%)                  | 217 (49%)                  | 185 (30%)                  | 77 (33%)                   | 97 (15%)                   |  |
| Unknown                                   | 1                          | 0                          | 0                          | 0                          | 0                          | 0                          | 0                          | 0                          | 0                          | 0                          | 0                          | 0                          | 0                          | 0                          | 0                          |  |
| Practising healthcare professional        |                            |                            |                            |                            |                            |                            |                            |                            |                            |                            |                            |                            |                            |                            |                            |  |
| No                                        | 557 (87%)                  | 365 (66%)                  | 354 (96%)                  | 345 (94%)                  | 303 (89%)                  | 249 (54%)                  | 166 (73%)                  | 2,065 (97%)                | 389 (73%)                  | 225 (55%)                  | 189 (93%)                  | 311 (71%)                  | 420 (69%)                  | 117 (50%)                  | 619 (93%)                  |  |
| Yes                                       | 82 (13%)                   | 188 (34%)                  | 15 (4.2%)                  | 23 (6.3%)                  | 39 (11%)                   | 212 (46%)                  | 63 (27%)                   | 62 (2.9%)                  | 140 (27%)                  | 181 (45%)                  | 14 (7.0%)                  | 129 (29%)                  | 192 (31%)                  | 116 (50%)                  | 48 (7.2%)                  |  |
| Unknown                                   | 0                          | 0                          | 0                          | 0                          | 0                          | 0                          | 0                          | 0                          | 0                          | 0                          | 0                          | 0                          | 0                          | 0                          | 0                          |  |
| Number of children less than 18 years old |                            |                            |                            |                            |                            |                            |                            |                            |                            |                            |                            |                            |                            |                            |                            |  |
| No                                        | 526 (82%)                  | 397 (72%)                  | 193 (52%)                  | 270 (73%)                  | 240 (70%)                  | 233 (50%)                  | 172 (75%)                  | 1,591 (75%)                | 325 (61%)                  | 255 (63%)                  | 152 (75%)                  | 284 (65%)                  | 372 (61%)                  | 125 (54%)                  | 360 (54%)                  |  |
| Yes                                       | 113 (18%)                  | 156 (28%)                  | 176 (48%)                  | 98 (27%)                   | 102 (30%)                  | 228 (50%)                  | 57 (25%)                   | 536 (25%)                  | 204 (39%)                  | 151 (37%)                  | 51 (25%)                   | 156 (35%)                  | 240 (39%)                  | 107 (46%)                  | 307 (46%)                  |  |
| Number of children aged above 18          | 0.30 (0.70) (0.00 to 3.00) | 0.43 (0.86) (0.00 to 8.00) | 1.00 (1.21) (0.00 to 6.00) | 0.49 (0.95) (0.00 to 5.00) | 0.45 (0.83) (0.00 to 5.00) | 1.03 (1.25) (0.00 to 5.00) | 0.41 (0.82) (0.00 to 5.00) | 0.34 (0.64) (0.00 to 4.00) | 0.59 (0.86) (0.00 to 5.00) | 0.44 (0.62) (0.00 to 2.00) | 0.40 (0.76) (0.00 to 3.00) | 0.84 (1.26) (0.00 to 5.00) | 1.13 (1.66) (0.00 to 6.00) | 0.79 (1.00) (0.00 to 7.00) | 0.57 (0.73) (0.00 to 6.00) |  |
| Unknown                                   | 0                          | 10                         | 0                          | 1                          | 4                          | 10                         | 3                          | 0                          | 1                          | 0                          | 0                          | 0                          | 12                         | 0                          | 10                         |  |

|                             |                               |                               |                               |                               |                               |                                |                                |                               |                                |                               |                               |                                |                                |                                |                                |
|-----------------------------|-------------------------------|-------------------------------|-------------------------------|-------------------------------|-------------------------------|--------------------------------|--------------------------------|-------------------------------|--------------------------------|-------------------------------|-------------------------------|--------------------------------|--------------------------------|--------------------------------|--------------------------------|
| Number of people lived with | 2.74 (1.19)<br>(1.00 to 6.00) | 2.77 (1.28)<br>(1.00 to 7.00) | 4.11 (1.46)<br>(1.00 to 8.00) | 2.46 (1.31)<br>(1.00 to 7.00) | 3.01 (1.41)<br>(1.00 to 8.00) | 4.50 (1.85)<br>(1.00 to 17.00) | 4.01 (2.09)<br>(1.00 to 12.00) | 3.27 (1.13)<br>(1.00 to 9.00) | 3.76 (1.69)<br>(1.00 to 20.00) | 4.38 (1.31)<br>(1.00 to 9.00) | 2.51 (1.18)<br>(1.00 to 6.00) | 4.25 (1.45)<br>(1.00 to 11.00) | 5.90 (2.97)<br>(1.00 to 26.00) | 3.87 (1.60)<br>(1.00 to 12.00) | 3.22 (1.17)<br>(1.00 to 10.00) |
| Unknown                     | 41                            | 0                             | 4                             | 1                             | 0                             | 3                              | 0                              | 0                             | 2                              | 0                             | 1                             | 0                              | 16                             | 0                              | 49                             |
| Perceived social rank       | 3.15 (0.93)<br>(1.00 to 5.00) | 3.51 (0.83)<br>(1.00 to 5.00) | 1.69 (0.76)<br>(1.00 to 4.00) | 3.43 (0.97)<br>(1.00 to 5.00) | 3.19 (0.85)<br>(1.00 to 5.00) | 3.41 (0.93)<br>(1.00 to 5.00)  | 3.26 (0.73)<br>(1.00 to 5.00)  | 2.69 (0.78)<br>(1.00 to 5.00) | 2.97 (1.16)<br>(1.00 to 5.00)  | 3.45 (0.83)<br>(1.00 to 5.00) | 3.57 (0.72)<br>(2.00 to 5.00) | 2.99 (0.78)<br>(1.00 to 5.00)  | 3.25 (1.10)<br>(1.00 to 5.00)  | 3.41 (0.70)<br>(1.00 to 5.00)  | 2.81 (0.79)<br>(1.00 to 5.00)  |
| Unknown                     | 1                             | 0                             | 0                             | 0                             | 0                             | 0                              | 0                              | 0                             | 0                              | 11                            | 0                             | 0                              | 0                              | 0                              | 1                              |
| House size                  | 175 (141) (10 to 575)         | 137 (89) (10 to 500)          | 85 (31) (10 to 202)           | 137 (84) (3 to 550)           | 92 (51) (10 to 400)           | 119 (56) (10 to 400)           | 163 (118) (10 to 550)          | 39 (19) (9 to 195)            | 53 (61) (1 to 581)             | 194 (117) (10 to 590)         | 115 (47) (40 to 315)          | 135 (66) (10 to 570)           | 244 (144) (11 to 500)          | 140 (117) (10 to 570)          | 105 (46) (11 to 400)           |
| Unknown                     | 431                           | 29                            | 2                             | 113                           | 31                            | 2                              | 23                             | 1                             | 30                             | 0                             | 13                            | 21                             | 281                            | 0                              | 5                              |

(Continued)

| Characteristic                  | Malaysia, N = 535 <sup>1</sup> | Mexico, N = 1,016 <sup>1</sup> | Nigeria, N = 580 <sup>1</sup> | Philippines, N = 457 <sup>1</sup> | Republic Of Sudan, N = 538 <sup>1</sup> | Rwanda, N = 136 <sup>1</sup> | Saudi Arabia, N = 609 <sup>1</sup> | Singapore, N = 237 <sup>1</sup> | South Africa, N = 192 <sup>1</sup> | South Korea, N = 2,238 <sup>1</sup> | Spain, N = 45 <sup>1</sup> | Thailand, N = 723 <sup>1</sup> | United Kingdom, N = 212 <sup>1</sup> | United States, N = 184 <sup>1</sup> | Vietnam, N = 401 <sup>1</sup> |
|---------------------------------|--------------------------------|--------------------------------|-------------------------------|-----------------------------------|-----------------------------------------|------------------------------|------------------------------------|---------------------------------|------------------------------------|-------------------------------------|----------------------------|--------------------------------|--------------------------------------|-------------------------------------|-------------------------------|
| <b>Age</b>                      |                                |                                |                               |                                   |                                         |                              |                                    |                                 |                                    |                                     |                            |                                |                                      |                                     |                               |
| 18-24                           | 75 (14%)                       | 127 (13%)                      | 127 (22%)                     | 74 (16%)                          | 108 (20%)                               | 29 (21%)                     | 70 (12%)                           | 24 (10%)                        | 28 (15%)                           | 185 (8.3%)                          | 3 (7.6%)                   | 70 (9.7%)                      | 18 (8.3%)                            | 19 (10%)                            | 51 (13%)                      |
| 25-29                           | 78 (15%)                       | 122 (12%)                      | 116 (20%)                     | 65 (14%)                          | 90 (17%)                                | 26 (19%)                     | 88 (14%)                           | 20 (8.6%)                       | 31 (16%)                           | 185 (8.3%)                          | 2 (4.1%)                   | 76 (11%)                       | 19 (9.0%)                            | 20 (11%)                            | 64 (16%)                      |
| 30-34                           | 69 (13%)                       | 115 (11%)                      | 90 (15%)                      | 57 (13%)                          | 74 (14%)                                | 24 (18%)                     | 89 (15%)                           | 21 (8.9%)                       | 33 (17%)                           | 179 (8.0%)                          | 2 (4.5%)                   | 81 (11%)                       | 19 (8.8%)                            | 19 (10%)                            | 64 (16%)                      |
| 35-39                           | 62 (12%)                       | 110 (11%)                      | 69 (12%)                      | 53 (11%)                          | 69 (13%)                                | 21 (15%)                     | 100 (16%)                          | 21 (9.0%)                       | 28 (14%)                           | 217 (9.7%)                          | 2 (5.4%)                   | 84 (12%)                       | 18 (8.5%)                            | 19 (10%)                            | 59 (15%)                      |
| 40-44                           | 48 (9.0%)                      | 104 (10%)                      | 61 (11%)                      | 46 (10.0%)                        | 53 (9.9%)                               | 15 (11%)                     | 89 (15%)                           | 21 (9.0%)                       | 22 (11%)                           | 210 (9.4%)                          | 6 (13%)                    | 85 (12%)                       | 17 (7.9%)                            | 17 (9.3%)                           | 51 (13%)                      |
| 45-49                           | 43 (8.0%)                      | 97 (9.5%)                      | 44 (7.5%)                     | 41 (9.0%)                         | 46 (8.6%)                               | 5 (3.6%)                     | 66 (11%)                           | 22 (9.4%)                       | 18 (9.6%)                          | 242 (11%)                           | 6 (13%)                    | 79 (11%)                       | 19 (9.0%)                            | 18 (9.8%)                           | 48 (12%)                      |
| 50-54                           | 39 (7.4%)                      | 86 (8.5%)                      | 40 (6.9%)                     | 35 (7.6%)                         | 32 (6.0%)                               | 4 (3.0%)                     | 46 (7.6%)                          | 21 (8.9%)                       | 15 (7.8%)                          | 219 (9.8%)                          | 5 (12%)                    | 69 (9.5%)                      | 20 (9.2%)                            | 18 (9.8%)                           | 43 (11%)                      |
| 55-59                           | 35 (6.6%)                      | 70 (6.8%)                      | 20 (3.4%)                     | 28 (6.2%)                         | 25 (4.7%)                               | 8 (6.0%)                     | 32 (5.2%)                          | 22 (9.2%)                       | 13 (6.7%)                          | 230 (10%)                           | 5 (11%)                    | 53 (7.4%)                      | 18 (8.4%)                            | 19 (10%)                            | 21 (5.2%)                     |
| 60-64                           | 29 (5.4%)                      | 59 (5.8%)                      | 13 (2.2%)                     | 22 (4.7%)                         | 17 (3.2%)                               | 4 (2.7%)                     | 13 (2.2%)                          | 20 (8.5%)                       | 4 (2.3%)                           | 180 (8.0%)                          | 0 (0%)                     | 41 (5.7%)                      | 15 (7.2%)                            | 9 (5.0%)                            | 0 (0%)                        |
| >=65                            | 55 (10%)                       | 126 (12%)                      | 0 (0%)                        | 37 (8.2%)                         | 23 (4.3%)                               | 0 (0%)                       | 16 (2.6%)                          | 44 (18%)                        | 0 (0%)                             | 391 (17%)                           | 13 (30%)                   | 86 (12%)                       | 51 (24%)                             | 25 (14%)                            | 0 (0%)                        |
| <b>Gender</b>                   |                                |                                |                               |                                   |                                         |                              |                                    |                                 |                                    |                                     |                            |                                |                                      |                                     |                               |
| Female                          | 260 (49%)                      | 529 (52%)                      | 287 (49%)                     | 223 (49%)                         | 262 (49%)                               | 65 (48%)                     | 225 (37%)                          | 122 (52%)                       | 95 (49%)                           | 1,121 (50%)                         | 26 (58%)                   | 366 (51%)                      | 109 (51%)                            | 109 (59%)                           | 208 (52%)                     |
| Male                            | 274 (51%)                      | 479 (47%)                      | 290 (50%)                     | 225 (49%)                         | 276 (51%)                               | 66 (49%)                     | 384 (63%)                          | 104 (44%)                       | 97 (50%)                           | 1,110 (50%)                         | 18 (41%)                   | 344 (48%)                      | 103 (49%)                            | 72 (39%)                            | 190 (48%)                     |
| Non-binary                      | 1 (0.2%)                       | 8 (0.8%)                       | 3 (0.4%)                      | 9 (2.0%)                          | 0 (0%)                                  | 5 (3.5%)                     | 0 (0%)                             | 11 (4.7%)                       | 0 (<0.1%)                          | 6 (0.3%)                            | 0 (1.1%)                   | 14 (1.9%)                      | 0 (0.2%)                             | 3 (1.8%)                            | 2 (0.5%)                      |
| <b>Marital</b>                  |                                |                                |                               |                                   |                                         |                              |                                    |                                 |                                    |                                     |                            |                                |                                      |                                     |                               |
| Single                          | 159 (30%)                      | 433 (43%)                      | 281 (48%)                     | 208 (46%)                         | 254 (47%)                               | 59 (43%)                     | 174 (29%)                          | 93 (39%)                        | 77 (40%)                           | 686 (31%)                           | 9 (19%)                    | 424 (59%)                      | 45 (21%)                             | 64 (35%)                            | 105 (26%)                     |
| Married/Cohabitation/Common-law | 353 (66%)                      | 432 (43%)                      | 278 (48%)                     | 220 (48%)                         | 244 (45%)                               | 70 (51%)                     | 411 (67%)                          | 137 (58%)                       | 106 (55%)                          | 1,427 (64%)                         | 32 (71%)                   | 256 (35%)                      | 146 (69%)                            | 108 (59%)                           | 284 (71%)                     |
| Separated/Divorced/Widowed      | 24 (4.5%)                      | 151 (15%)                      | 20 (3.5%)                     | 29 (6.3%)                         | 40 (7.5%)                               | 8 (5.7%)                     | 24 (3.9%)                          | 7 (3.0%)                        | 9 (4.7%)                           | 125 (5.6%)                          | 4 (9.6%)                   | 43 (6.0%)                      | 20 (9.6%)                            | 12 (6.4%)                           | 12 (2.9%)                     |
| Unknown                         | 0                              | 0                              | 0                             | 0                                 | 0                                       | 0                            | 0                                  | 0                               | 0                                  | 0                                   | 0                          | 0                              | 0                                    | 0                                   | 0                             |
| <b>Education</b>                |                                |                                |                               |                                   |                                         |                              |                                    |                                 |                                    |                                     |                            |                                |                                      |                                     |                               |
| Primary or below                | 24 (4.5%)                      | 14 (1.4%)                      | 2 (0.4%)                      | 2 (0.4%)                          | 24 (4.4%)                               | 0 (0%)                       | 4 (0.7%)                           | 1 (0.3%)                        | 0 (0%)                             | 2 (<0.1%)                           | 0 (0%)                     | 14 (1.9%)                      | 0 (0%)                               | 3 (3.0%)                            | 0 (0%)                        |
| Secondary                       | 57 (11%)                       | 95 (9.4%)                      | 23 (3.9%)                     | 23 (5.0%)                         | 52 (9.7%)                               | 31 (23%)                     | 86 (14%)                           | 2 (0.9%)                        | 27 (14%)                           | 30 (1.3%)                           | 3 (6.4%)                   | 17 (2.4%)                      | 12 (5.7%)                            | 1 (1.2%)                            | 9 (2.3%)                      |

|                           |                    |                     |                     |                          |                           |                           |                           |                           |                           |                           |                           |                           |                          |                           |                           |  |
|---------------------------|--------------------|---------------------|---------------------|--------------------------|---------------------------|---------------------------|---------------------------|---------------------------|---------------------------|---------------------------|---------------------------|---------------------------|--------------------------|---------------------------|---------------------------|--|
| Associate degree          | 143 (27%)          | 3 (0.3%)            | 16 (2.8%)           | 10 (2.3%)                | 25 (4.6%)                 | 8 (6.0%)                  | 13 (2.1%)                 | 1 (0.6%)                  | 2 (1.3%)                  | 316 (14%)                 | 1 (1.1%)                  | 22 (3.0%)                 | 2 (1.2%)                 | 3 (2.8%)                  | 36 (9.0%)                 |  |
| College                   | 112 (21%)          | 122 (12%)           | 143 (25%)           | 74 (16%)                 | 26 (4.8%)                 | 10 (7.2%)                 | 26 (4.3%)                 | 37 (16%)                  | 22 (11%)                  | 464 (21%)                 | 16 (37%)                  | 6 (0.9%)                  | 52 (25%)                 | 10 (10%)                  | 22 (5.5%)                 |  |
| Bachelor                  | 153 (29%)          | 320 (32%)           | 249 (43%)           | 216 (47%)                | 284 (53%)                 | 47 (34%)                  | 324 (53%)                 | 132 (56%)                 | 89 (46%)                  | 1,165 (52%)               | 4 (7.9%)                  | 199 (28%)                 | 62 (29%)                 | 22 (23%)                  | 188 (47%)                 |  |
| Graduate                  | 44 (8.3%)          | 461 (45%)           | 147 (25%)           | 133 (29%)                | 128 (24%)                 | 40 (30%)                  | 154 (25%)                 | 63 (27%)                  | 52 (27%)                  | 261 (12%)                 | 21 (48%)                  | 462 (64%)                 | 82 (39%)                 | 57 (60%)                  | 145 (36%)                 |  |
| Unknown                   | 2                  | 0                   | 0                   | 0                        | 0                         | 0                         | 2                         | 0                         | 0                         | 0                         | 0                         | 3                         | 2                        | 89                        | 0                         |  |
| <b>Employment</b>         |                    |                     |                     |                          |                           |                           |                           |                           |                           |                           |                           |                           |                          |                           |                           |  |
| Job seeking               | 15 (2.9%)          | 28 (2.7%)           | 49 (8.5%)           | 19 (4.2%)                | 34 (6.3%)                 | 13 (9.2%)                 | 50 (8.2%)                 | 1 (0.3%)                  | 8 (4.1%)                  | 93 (4.1%)                 | 3 (6.6%)                  | 22 (3.1%)                 | 4 (1.8%)                 | 1 (0.6%)                  | 8 (2.0%)                  |  |
| Laid off                  | 1 (0.2%)           | 7 (0.7%)            | 14 (2.4%)           | 0 (0%)                   | 14 (2.5%)                 | 1 (0.8%)                  | 6 (1.0%)                  | 0 (0%)                    | 1 (0.6%)                  | 9 (0.4%)                  | 0 (0%)                    | 4 (0.5%)                  | 5 (2.4%)                 | 0 (0%)                    | 0 (0%)                    |  |
| Not in workforce          | 35 (6.5%)          | 24 (2.4%)           | 4 (0.7%)            | 23 (4.9%)                | 82 (15%)                  | 1 (0.5%)                  | 60 (9.8%)                 | 2 (1.0%)                  | 3 (1.3%)                  | 396 (18%)                 | 0 (0%)                    | 7 (1.0%)                  | 3 (1.6%)                 | 2 (1.2%)                  | 0 (0%)                    |  |
| Retired                   | 68 (13%)           | 60 (5.9%)           | 0 (0%)              | 32 (7.1%)                | 3 (0.6%)                  | 0 (0%)                    | 46 (7.5%)                 | 22 (9.1%)                 | 4 (1.9%)                  | 87 (3.9%)                 | 10 (22%)                  | 97 (13%)                  | 31 (15%)                 | 15 (8.2%)                 | 37 (9.3%)                 |  |
| Self-employed             | 53 (10.0%)         | 132 (13%)           | 28 (4.8%)           | 61 (13%)                 | 56 (10%)                  | 12 (8.7%)                 | 11 (1.7%)                 | 4 (1.6%)                  | 41 (21%)                  | 324 (14%)                 | 8 (18%)                   | 75 (10%)                  | 8 (4.0%)                 | 12 (6.6%)                 | 20 (5.0%)                 |  |
| Student                   | 99 (18%)           | 145 (14%)           | 134 (23%)           | 70 (15%)                 | 131 (24%)                 | 23 (17%)                  | 81 (13%)                  | 42 (18%)                  | 32 (16%)                  | 150 (6.7%)                | 4 (10%)                   | 89 (12%)                  | 32 (15%)                 | 21 (11%)                  | 49 (12%)                  |  |
| Working (>=40hrs/wk)      | 203 (38%)          | 409 (40%)           | 221 (38%)           | 202 (44%)                | 82 (15%)                  | 64 (47%)                  | 191 (31%)                 | 142 (60%)                 | 83 (43%)                  | 891 (40%)                 | 12 (27%)                  | 307 (43%)                 | 54 (25%)                 | 87 (47%)                  | 217 (54%)                 |  |
| Working (1-39hrs/wk)      | 60 (11%)           | 211 (21%)           | 129 (22%)           | 50 (11%)                 | 137 (25%)                 | 23 (17%)                  | 165 (27%)                 | 25 (11%)                  | 22 (11%)                  | 289 (13%)                 | 8 (17%)                   | 121 (17%)                 | 74 (35%)                 | 45 (25%)                  | 69 (17%)                  |  |
| <b>Height (m)</b>         |                    |                     |                     |                          |                           |                           |                           |                           |                           |                           |                           |                           |                          |                           |                           |  |
|                           | 1.62 (0.08)        | 1.66 (0.10)         | 1.65 (0.17)         | 1.61 (0.11)              | 1.67 (0.12)               | 1.66 (0.09)               | 1.68 (0.09)               | 1.67 (0.11)               | 1.65 (0.13)               | 1.66 (0.08)               | 1.69 (0.07)               | 1.65 (0.08)               | 1.69 (0.10)              | 1.68 (0.07)               | 1.61 (0.07)               |  |
|                           | (1.40 to 1.85)     | (1.23 to 2.10)      | (1.20 to 2.20)      | (1.15 to 1.96)           | (1.12 to 2.00)            | (1.40 to 1.93)            | (1.35 to 1.95)            | (1.48 to 1.85)            | (1.10 to 1.96)            | (1.40 to 1.90)            | (1.50 to 1.85)            | (1.43 to 1.85)            | (1.25 to 1.95)           | (1.45 to 1.80)            | (1.45 to 1.84)            |  |
| Unknown                   | 0                  | 2                   | 20                  | 5                        | 9                         | 6                         | 2                         | 0                         | 1                         | 0                         | 0                         | 1                         | 0                        | 15                        | 0                         |  |
| <b>Weight(kg)</b>         |                    |                     |                     |                          |                           |                           |                           |                           |                           |                           |                           |                           |                          |                           |                           |  |
|                           | 66 (12) (35 to 98) | 72 (15) (40 to 120) | 64 (12) (25 to 100) | 67 (15) (21 to 112)      | 72 (16) (35 to 120)       | 67 (12) (32 to 97)        | 77 (18) (35 to 145)       | 68 (13) (39 to 103)       | 71 (19) (40 to 140)       | 65 (12) (32 to 137)       | 73 (13) (49 to 100)       | 65 (14) (37 to 108)       | 75 (20) (16 to 160)      | 76 (16) (40 to 134)       | 58 (9) (38 to 88)         |  |
| Unknown                   | 0                  | 3                   | 4                   | 0                        | 0                         | 0                         | 2                         | 0                         | 0                         | 0                         | 0                         | 3                         | 0                        | 14                        | 0                         |  |
| <b>BMI</b>                |                    |                     |                     |                          |                           |                           |                           |                           |                           |                           |                           |                           |                          |                           |                           |  |
|                           | 25.1 (4.3)         | 26.2 (4.3)          | 24.4 (6.6)          | 25.8 (5.2) (7.5 to 47.4) | 25.9 (5.1) (10.8 to 38.3) | 24.6 (3.7) (12.9 to 32.9) | 27.3 (5.3) (12.9 to 53.5) | 24.5 (4.0) (15.2 to 36.9) | 25.9 (6.7) (14.3 to 56.7) | 23.3 (3.3) (13.3 to 45.7) | 25.6 (3.9) (18.0 to 36.3) | 23.6 (4.2) (14.1 to 38.9) | 26.3 (7.0) (6.2 to 50.6) | 27.1 (5.9) (16.9 to 50.2) | 22.4 (2.4) (14.7 to 32.9) |  |
| Unknown                   | 0                  | 5                   | 22                  | 5                        | 9                         | 6                         | 2                         | 0                         | 2                         | 0                         | 0                         | 3                         | 0                        | 17                        | 0                         |  |
| <b>BMI classification</b> |                    |                     |                     |                          |                           |                           |                           |                           |                           |                           |                           |                           |                          |                           |                           |  |
| Severely underweight      | 14 (2.7%)          | 9 (0.9%)            | 28 (5.1%)           | 7 (1.4%)                 | 9 (1.7%)                  | 2 (1.6%)                  | 4 (0.6%)                  | 0 (0.1%)                  | 2 (1.1%)                  | 9 (0.4%)                  | 0 (0%)                    | 12 (1.7%)                 | 8 (3.8%)                 | 0 (0%)                    | 1 (0.3%)                  |  |



|                                           |                            |                            |                            |                            |                            |                            |                            |                            |                            |                            |                            |                            |                            |                            |                            |  |
|-------------------------------------------|----------------------------|----------------------------|----------------------------|----------------------------|----------------------------|----------------------------|----------------------------|----------------------------|----------------------------|----------------------------|----------------------------|----------------------------|----------------------------|----------------------------|----------------------------|--|
| Underweight                               | 13 (2.4%)                  | 16 (1.6%)                  | 40 (7.1%)                  | 19 (4.1%)                  | 20 (3.8%)                  | 0 (0.3%)                   | 15 (2.5%)                  | 7 (3.1%)                   | 14 (7.3%)                  | 101 (4.5%)                 | 1 (1.5%)                   | 43 (6.0%)                  | 4 (1.8%)                   | 1 (0.6%)                   | 20 (4.9%)                  |  |
| Normal weight                             | 159 (30%)                  | 370 (37%)                  | 289 (52%)                  | 122 (27%)                  | 211 (40%)                  | 70 (54%)                   | 91 (15%)                   | 97 (41%)                   | 78 (41%)                   | 983 (44%)                  | 22 (49%)                   | 304 (42%)                  | 89 (42%)                   | 65 (38%)                   | 212 (53%)                  |  |
| Overweight                                | 92 (17%)                   | 434 (43%)                  | 117 (21%)                  | 65 (14%)                   | 153 (29%)                  | 47 (36%)                   | 93 (15%)                   | 37 (16%)                   | 55 (29%)                   | 530 (24%)                  | 15 (32%)                   | 134 (19%)                  | 63 (30%)                   | 68 (41%)                   | 120 (30%)                  |  |
| Obesity                                   | 257 (48%)                  | 182 (18%)                  | 84 (15%)                   | 239 (53%)                  | 136 (26%)                  | 11 (8.2%)                  | 404 (67%)                  | 96 (40%)                   | 41 (22%)                   | 614 (27%)                  | 7 (17%)                    | 226 (31%)                  | 47 (22%)                   | 34 (20%)                   | 48 (12%)                   |  |
| Unknown                                   | 0                          | 5                          | 22                         | 5                          | 9                          | 6                          | 2                          | 0                          | 2                          | 0                          | 0                          | 3                          | 0                          | 17                         | 0                          |  |
| Pregnant                                  |                            |                            |                            |                            |                            |                            |                            |                            |                            |                            |                            |                            |                            |                            |                            |  |
| Not applicable                            | 274 (51%)                  | 479 (47%)                  | 290 (50%)                  | 225 (49%)                  | 276 (51%)                  | 66 (49%)                   | 384 (63%)                  | 104 (44%)                  | 97 (50%)                   | 1,117 (50%)                | 18 (41%)                   | 344 (48%)                  | 103 (49%)                  | 72 (39%)                   | 190 (48%)                  |  |
| No                                        | 250 (47%)                  | 533 (52%)                  | 261 (45%)                  | 229 (50%)                  | 253 (47%)                  | 63 (46%)                   | 213 (35%)                  | 132 (56%)                  | 95 (49%)                   | 1,115 (50%)                | 26 (59%)                   | 377 (52%)                  | 109 (51%)                  | 110 (60%)                  | 205 (51%)                  |  |
| Yes                                       | 11 (2.1%)                  | 4 (0.4%)                   | 28 (4.9%)                  | 4 (0.8%)                   | 9 (1.7%)                   | 7 (5.3%)                   | 12 (2.0%)                  | 1 (0.6%)                   | 0 (<0.1%)                  | 6 (0.3%)                   | 0 (0%)                     | 2 (0.3%)                   | 0 (0%)                     | 2 (0.8%)                   | 5 (1.4%)                   |  |
| Gestational week                          | 24 (10) (12 to 35)         | 24 (0) (24 to 24)          | 5 (17 to 34)               | 0 (0) (Inf to -Inf)        | 6 (0) (6 to 8)             | 6 (2) (4 to 9)             | 14 (10) (5 to 30)          | 10 (0) (10 to 10)          | 0 (0) (Inf to -Inf)        | 9 (2) (5 to 10)            | 0 (0) (Inf to -Inf)        | 17 (13) (6 to 36)          | 0 (0) (Inf to -Inf)        | 29 (4) (25 to 34)          | 31 (7) (15 to 36)          |  |
| Unknown                                   | 527                        | 1,015                      | 574                        | 457                        | 529                        | 133                        | 606                        | 236                        | 192                        | 2,232                      | 45                         | 721                        | 212                        | 183                        | 397                        |  |
| Regular medical follow-up before COVID-19 |                            |                            |                            |                            |                            |                            |                            |                            |                            |                            |                            |                            |                            |                            |                            |  |
| No                                        | 339 (63%)                  | 595 (59%)                  | 409 (70%)                  | 325 (71%)                  | 407 (76%)                  | 118 (86%)                  | 412 (68%)                  | 127 (54%)                  | 131 (68%)                  | 1,264 (56%)                | 24 (54%)                   | 405 (56%)                  | 104 (49%)                  | 73 (40%)                   | 69 (17%)                   |  |
| Yes                                       | 196 (37%)                  | 421 (41%)                  | 171 (30%)                  | 132 (29%)                  | 131 (24%)                  | 19 (14%)                   | 198 (32%)                  | 110 (46%)                  | 61 (32%)                   | 974 (44%)                  | 20 (46%)                   | 318 (44%)                  | 108 (51%)                  | 109 (60%)                  | 332 (83%)                  |  |
| Unknown                                   | 0                          | 0                          | 0                          | 0                          | 0                          | 0                          | 0                          | 0                          | 0                          | 0                          | 0                          | 0                          | 0                          | 2                          | 0                          |  |
| Practising healthcare professional        |                            |                            |                            |                            |                            |                            |                            |                            |                            |                            |                            |                            |                            |                            |                            |  |
| No                                        | 344 (64%)                  | 387 (38%)                  | 265 (46%)                  | 323 (71%)                  | 378 (70%)                  | 73 (53%)                   | 433 (71%)                  | 101 (42%)                  | 127 (66%)                  | 2,163 (97%)                | 40 (90%)                   | 649 (90%)                  | 140 (66%)                  | 88 (47%)                   | 175 (44%)                  |  |
| Yes                                       | 191 (36%)                  | 629 (62%)                  | 315 (54%)                  | 134 (29%)                  | 160 (30%)                  | 64 (47%)                   | 176 (29%)                  | 136 (58%)                  | 65 (34%)                   | 75 (3.4%)                  | 4 (10.0%)                  | 74 (10%)                   | 72 (34%)                   | 97 (53%)                   | 226 (56%)                  |  |
| Unknown                                   | 0                          | 0                          | 0                          | 0                          | 0                          | 0                          | 0                          | 0                          | 0                          | 0                          | 0                          | 0                          | 0                          | 0                          | 0                          |  |
| Number of children less than 18 years old |                            |                            |                            |                            |                            |                            |                            |                            |                            |                            |                            |                            |                            |                            |                            |  |
| No                                        | 320 (60%)                  | 756 (74%)                  | 358 (62%)                  | 283 (62%)                  | 350 (65%)                  | 72 (53%)                   | 254 (42%)                  | 165 (70%)                  | 138 (72%)                  | 1,646 (74%)                | 30 (68%)                   | 613 (85%)                  | 153 (72%)                  | 134 (72%)                  | 146 (36%)                  |  |
| Yes                                       | 215 (40%)                  | 260 (26%)                  | 221 (38%)                  | 174 (38%)                  | 188 (35%)                  | 64 (47%)                   | 356 (58%)                  | 72 (30%)                   | 54 (28%)                   | 592 (26%)                  | 14 (32%)                   | 110 (15%)                  | 59 (28%)                   | 51 (28%)                   | 255 (64%)                  |  |
| Number of children aged above 18          | 0-92 (1.42) (0.00 to 8.00) | 0-44 (0.98) (0.00 to 0.00) | 1-03 (1.71) (0.00 to 0.00) | 0-66 (1.01) (0.00 to 4.00) | 0-96 (1.53) (0.00 to 6.00) | 1-00 (1.31) (0.00 to 0.00) | 1-62 (1.74) (0.00 to 0.00) | 0-59 (0.98) (0.00 to 0.00) | 0-45 (0.82) (0.00 to 0.00) | 0-42 (0.76) (0.00 to 5.00) | 0-55 (0.88) (0.00 to 0.00) | 0-21 (0.56) (0.00 to 4.00) | 0-46 (0.88) (0.00 to 6.00) | 0-44 (0.81) (0.00 to 0.00) | 1-08 (0.95) (0.00 to 0.00) |  |

|                             |                         |                          |                       |                         |                          |                         |                          |                        |                         |                        |                         |                          |                         |                          |                          |
|-----------------------------|-------------------------|--------------------------|-----------------------|-------------------------|--------------------------|-------------------------|--------------------------|------------------------|-------------------------|------------------------|-------------------------|--------------------------|-------------------------|--------------------------|--------------------------|
|                             |                         | 11-00)                   | 10-00)                |                         |                          | 5-00)                   | 7-00)                    | 4-00)                  | (0-00 to<br>3-00)       |                        | 3-00)                   |                          |                         | 4-00)                    | 4-00)                    |
| Unknown                     | 0                       | 14                       | 5                     | 3                       | 10                       | 0                       | 17                       | 0                      | 0                       | 0                      | 0                       | 2                        | 2                       | 0                        | 0                        |
| Number of people lived with | 4-63 (2-24)             | 3-38 (1-76)              | 4-74 (2-92)           | 4-91 (2-30)             | 6-28 (2-75)              | 4-41 (2-22)             | 6-00 (2-67)              | 3-97 (1-61)            | 3-96<br>(2-01)          | 3-02 (1-13)            | 2-98 (1-50)             | 3-32 (1-83)              | 2-67 (1-33)             | 2-61 (1-26)              | 4-18 (1-57)              |
|                             | (1-00 to<br>16-00)      | (1-00 to<br>14-00)       | (1-00 to<br>23-00)    | (1-00 to 14-00)         | (1-00 to<br>18-00)       | (1-00 to<br>10-00)      | (1-00 to<br>21-00)       | (1-00 to<br>10-00)     | (1-00 to<br>12-00)      | (1-00 to 7-00)         | (1-00 to<br>6-00)       | (1-00 to<br>18-00)       | (1-00 to 8-00)          | (1-00 to<br>8-00)        | (1-00 to<br>12-00)       |
| Unknown                     | 1                       | 4                        | 5                     | 5                       | 49                       | 0                       | 28                       | 0                      | 3                       | 0                      | 0                       | 1                        | 0                       | 16                       | 1                        |
| Perceived social rank       | 3-55 (0-84)             | 3-13 (0-66)              | 3-20 (0-97)           | 3-22 (0-71)             | 3-16 (0-96)              | 2-76 (0-80)             | 3-45 (1-01)              | 3-33 (0-73)            | 3-46<br>(0-87)          | 2-96 (0-70)            | 3-33 (0-78)             | 3-98 (0-83)              | 3-43 (0-79)             | 3-85 (0-83)              | 3-21 (0-76)              |
|                             | (1-00 to 5-00)          | (1-00 to<br>5-00)        | (1-00 to<br>5-00)     | (1-00 to 5-00)          | (1-00 to 5-00)           | (1-00 to<br>5-00)       | (1-00 to<br>5-00)        | (1-00 to<br>5-00)      | (1-00 to<br>5-00)       | (1-00 to 5-00)         | (1-00 to<br>5-00)       | (1-00 to 5-00)           | (1-00 to 5-00)          | (1-00 to<br>5-00)        | (1-00 to<br>5-00)        |
| Unknown                     | 0                       | 0                        | 0                     | 0                       | 0                        | 0                       | 0                        | 0                      | 0                       | 0                      | 0                       | 0                        | 0                       | 11                       | 0                        |
| House size                  | 154 (136) (1<br>to 594) | 137 (100)<br>(10 to 500) | 73 (77) (1 to<br>555) | 121 (104) (1 to<br>561) | 253 (145) (10<br>to 500) | 104 (44) (12<br>to 249) | 251 (157)<br>(10 to 555) | 102 (68) (1<br>to 500) | 169 (122)<br>(1 to 550) | 32 (13) (10 to<br>100) | 139 (71) (25 to<br>300) | 151 (128) (10<br>to 540) | 138 (119) (1<br>to 500) | 196 (111)<br>(20 to 560) | 186 (143)<br>(10 to 650) |
| Unknown                     | 19                      | 52                       | 24                    | 22                      | 168                      | 0                       | 245                      | 1                      | 5                       | 1                      | 0                       | 43                       | 17                      | 35                       | 7                        |

<sup>1</sup>n (%); Mean (SD) (Range)

**eTable 4. Description of respondents' weighted fear of 11 factors by country.**

| Country           | COVID-19 |      | Cancer |      | Stroke |      | Heart Attack |      | Traffic accident |      | No social life |      | Crisis |      | Loss of family members |      | Animals/Insects |      | Loss of mobile phone |      | Job loss |      |
|-------------------|----------|------|--------|------|--------|------|--------------|------|------------------|------|----------------|------|--------|------|------------------------|------|-----------------|------|----------------------|------|----------|------|
|                   | Mean     | SD   | Mean   | SD   | Mean   | SD   | Mean         | SD   | Mean             | SD   | Mean           | SD   | Mean   | SD   | Mean                   | SD   | Mean            | SD   | Mean                 | SD   | Mean     | SD   |
| All sample        | 6.23     | 2.92 | 7.00   | 3.09 | 6.61   | 3.24 | 6.55         | 3.20 | 6.35             | 3.10 | 4.83           | 3.13 | 5.64   | 3.38 | 7.46                   | 3.04 | 3.72            | 2.96 | 4.27                 | 2.98 | 5.43     | 3.31 |
| Australia         | 4.03     | 2.33 | 2.91   | 2.83 | 2.62   | 2.89 | 2.61         | 2.78 | 2.05             | 2.55 | 3.16           | 2.19 | 1.24   | 2.57 | 2.39                   | 3.37 | 1.04            | 2.04 | 2.15                 | 2.92 | 3.82     | 3.23 |
| Brazil            | 7.22     | 2.67 | 6.86   | 3.46 | 5.83   | 3.70 | 5.77         | 3.61 | 5.71             | 3.39 | 4.44           | 3.17 | 3.81   | 3.58 | 7.76                   | 2.77 | 3.00            | 3.03 | 3.13                 | 2.90 | 4.75     | 3.73 |
| Burundi           | 7.66     | 2.69 | 7.36   | 2.52 | 6.98   | 2.35 | 7.20         | 2.05 | 7.13             | 2.44 | 6.74           | 2.49 | 6.72   | 2.52 | 7.06                   | 2.38 | 5.99            | 2.64 | 6.69                 | 2.49 | 7.47     | 2.18 |
| Canada            | 3.97     | 3.38 | 5.00   | 3.01 | 4.30   | 3.19 | 4.34         | 3.09 | 4.37             | 2.95 | 4.18           | 3.47 | 3.09   | 3.06 | 5.69                   | 3.21 | 1.68            | 2.17 | 1.83                 | 2.18 | 3.06     | 3.31 |
| Chile             | 7.13     | 2.54 | 8.20   | 2.17 | 8.49   | 2.53 | 7.99         | 2.71 | 7.54             | 2.76 | 5.06           | 3.21 | 5.79   | 3.06 | 8.08                   | 2.42 | 2.54            | 2.40 | 2.64                 | 2.52 | 5.19     | 3.66 |
| Egypt             | 3.32     | 2.84 | 4.20   | 3.23 | 3.99   | 3.28 | 4.02         | 3.19 | 3.95             | 3.08 | 3.03           | 2.92 | 3.32   | 3.13 | 4.79                   | 3.31 | 2.73            | 2.98 | 2.79                 | 2.98 | 2.90     | 2.91 |
| Guatemala         | 7.09     | 2.46 | 8.21   | 2.64 | 7.91   | 2.83 | 7.36         | 2.96 | 6.67             | 2.71 | 3.09           | 2.85 | 5.73   | 3.10 | 8.20                   | 2.50 | 3.41            | 2.77 | 2.98                 | 2.55 | 6.22     | 3.47 |
| Hong Kong         | 7.07     | 1.88 | 8.12   | 1.79 | 6.74   | 2.48 | 6.59         | 2.48 | 6.16             | 2.50 | 4.44           | 2.30 | 5.86   | 2.96 | 7.98                   | 2.12 | 3.40            | 2.67 | 4.92                 | 2.36 | 5.57     | 2.49 |
| India             | 5.25     | 2.50 | 5.66   | 2.81 | 5.45   | 2.72 | 5.70         | 2.75 | 5.78             | 2.74 | 4.52           | 2.81 | 4.54   | 2.90 | 6.57                   | 2.88 | 4.00            | 2.40 | 3.79                 | 2.66 | 4.09     | 3.48 |
| Indonesia         | 6.57     | 2.22 | 7.16   | 1.97 | 6.99   | 2.31 | 7.24         | 2.33 | 7.02             | 2.32 | 6.47           | 2.91 | 6.77   | 2.50 | 8.39                   | 2.18 | 4.64            | 2.36 | 5.69                 | 2.61 | 7.02     | 2.44 |
| Italy             | 7.15     | 2.17 | 8.83   | 1.78 | 9.02   | 1.83 | 8.65         | 2.04 | 7.78             | 2.24 | 6.06           | 3.13 | 7.74   | 2.57 | 8.97                   | 1.73 | 3.88            | 3.14 | 3.41                 | 2.71 | 6.25     | 3.42 |
| Lebanon           | 3.30     | 2.90 | 4.50   | 3.80 | 4.34   | 3.75 | 4.42         | 3.55 | 3.81             | 3.22 | 3.31           | 2.94 | 4.31   | 3.41 | 5.14                   | 3.49 | 2.55            | 2.77 | 2.80                 | 2.75 | 3.77     | 3.09 |
| Libya             | 4.30     | 2.91 | 6.21   | 3.64 | 5.72   | 3.73 | 5.75         | 3.71 | 5.72             | 3.32 | 5.21           | 3.74 | 4.66   | 3.56 | 7.64                   | 3.44 | 3.99            | 3.47 | 4.69                 | 3.52 | 4.72     | 3.61 |
| Macau             | 6.56     | 2.33 | 7.61   | 2.52 | 7.34   | 2.53 | 6.87         | 2.40 | 6.86             | 2.63 | 4.90           | 2.57 | 7.03   | 2.86 | 8.46                   | 2.40 | 4.20            | 2.70 | 5.54                 | 2.79 | 6.08     | 2.87 |
| Mainland China    | 5.74     | 2.63 | 6.96   | 2.67 | 6.22   | 2.93 | 6.01         | 2.77 | 6.52             | 2.83 | 3.84           | 2.60 | 5.92   | 2.84 | 8.01                   | 2.62 | 3.54            | 2.60 | 4.20                 | 2.50 | 5.03     | 2.88 |
| Malaysia          | 7.05     | 2.50 | 7.70   | 2.60 | 7.77   | 2.40 | 7.95         | 2.33 | 7.84             | 2.34 | 5.62           | 2.88 | 7.30   | 2.75 | 8.31                   | 2.23 | 4.93            | 2.88 | 5.08                 | 3.07 | 6.42     | 3.23 |
| Mexico            | 7.37     | 2.53 | 7.86   | 2.77 | 7.81   | 2.98 | 7.56         | 2.97 | 6.85             | 2.92 | 3.43           | 3.20 | 6.12   | 3.25 | 8.04                   | 2.59 | 3.43            | 2.97 | 3.16                 | 2.85 | 6.26     | 3.37 |
| Nigeria           | 4.94     | 3.03 | 5.98   | 3.37 | 5.65   | 3.32 | 5.90         | 3.43 | 6.10             | 3.22 | 4.40           | 3.05 | 5.98   | 3.38 | 6.89                   | 3.20 | 4.32            | 2.99 | 4.76                 | 3.07 | 5.72     | 3.35 |
| Philippines       | 6.98     | 2.80 | 7.13   | 3.02 | 7.02   | 2.92 | 7.08         | 3.05 | 6.57             | 2.93 | 4.14           | 2.67 | 6.89   | 2.78 | 8.32                   | 2.35 | 4.28            | 2.81 | 4.85                 | 2.85 | 6.77     | 3.11 |
| Republic Of Sudan | 4.13     | 3.21 | 6.07   | 3.76 | 5.88   | 3.77 | 5.95         | 3.77 | 6.30             | 3.60 | 5.79           | 3.77 | 5.22   | 3.86 | 7.47                   | 3.42 | 3.34            | 3.53 | 4.75                 | 3.60 | 4.64     | 3.54 |
| Rwanda            | 4.86     | 2.96 | 6.05   | 3.36 | 5.73   | 3.65 | 5.49         | 3.36 | 5.73             | 3.12 | 3.75           | 2.88 | 4.70   | 3.62 | 6.61                   | 3.29 | 3.32            | 3.03 | 3.04                 | 2.90 | 5.73     | 3.38 |
| Saudi Arabia      | 4.45     | 2.91 | 6.49   | 3.62 | 6.35   | 3.68 | 6.37         | 3.67 | 6.22             | 3.37 | 5.32           | 3.62 | 5.23   | 3.79 | 7.16                   | 3.44 | 3.88            | 3.33 | 4.29                 | 3.14 | 5.33     | 3.57 |
| Singapore         | 5.35     | 2.64 | 6.59   | 2.71 | 6.83   | 2.56 | 6.74         | 2.58 | 6.00             | 2.73 | 4.51           | 2.67 | 5.27   | 3.31 | 7.48                   | 2.67 | 3.71            | 2.96 | 4.53                 | 2.97 | 5.61     | 3.15 |
| South Africa      | 6.09     | 3.01 | 7.48   | 2.67 | 6.78   | 3.02 | 7.08         | 2.99 | 6.76             | 2.83 | 3.02           | 2.87 | 6.15   | 3.31 | 8.12                   | 2.61 | 3.98            | 2.65 | 4.29                 | 3.10 | 6.84     | 3.16 |

|                |      |      |      |      |      |      |      |      |      |      |      |      |      |      |      |      |      |      |      |      |      |      |
|----------------|------|------|------|------|------|------|------|------|------|------|------|------|------|------|------|------|------|------|------|------|------|------|
| South Korea    | 8.12 | 1.92 | 8.57 | 1.87 | 8.59 | 1.88 | 8.56 | 1.94 | 8.12 | 2.04 | 6.90 | 2.43 | 7.53 | 2.32 | 8.69 | 1.95 | 4.82 | 2.61 | 5.36 | 2.45 | 6.59 | 2.69 |
| Spain          | 5.45 | 2.64 | 7.15 | 2.83 | 7.40 | 3.17 | 7.08 | 3.05 | 6.61 | 2.61 | 5.87 | 2.72 | 5.39 | 3.48 | 7.48 | 2.68 | 4.03 | 3.12 | 3.21 | 2.65 | 4.90 | 3.44 |
| Thailand       | 6.41 | 2.70 | 6.41 | 3.14 | 6.00 | 3.26 | 5.83 | 3.18 | 6.62 | 2.82 | 3.51 | 2.89 | 4.61 | 3.23 | 6.87 | 3.20 | 4.11 | 2.80 | 4.54 | 2.99 | 4.53 | 3.75 |
| United Kingdom | 6.30 | 2.60 | 6.89 | 3.07 | 6.36 | 3.23 | 6.16 | 3.12 | 5.31 | 3.41 | 5.12 | 3.10 | 4.04 | 3.38 | 7.45 | 2.94 | 3.65 | 3.06 | 3.04 | 2.57 | 4.10 | 3.10 |
| United States  | 6.06 | 2.73 | 7.24 | 2.69 | 6.42 | 3.20 | 6.17 | 3.10 | 6.31 | 2.81 | 4.27 | 3.01 | 5.64 | 3.09 | 7.35 | 2.68 | 3.28 | 2.78 | 4.79 | 2.99 | 3.29 | 2.86 |
| Vietnam        | 6.76 | 2.70 | 7.93 | 2.51 | 7.71 | 2.68 | 7.43 | 2.71 | 7.76 | 2.71 | 6.87 | 2.92 | 7.24 | 2.87 | 8.42 | 2.58 | 3.58 | 2.96 | 3.61 | 2.80 | 5.96 | 3.17 |

---

**eFigure 1. Visualization of the weighted fear of 11 factors by country, World Health Organization (WHO) region, economic development level, and COVID-19 severity level.**

**a. Weighted mean of fear of 11 factors by country.**

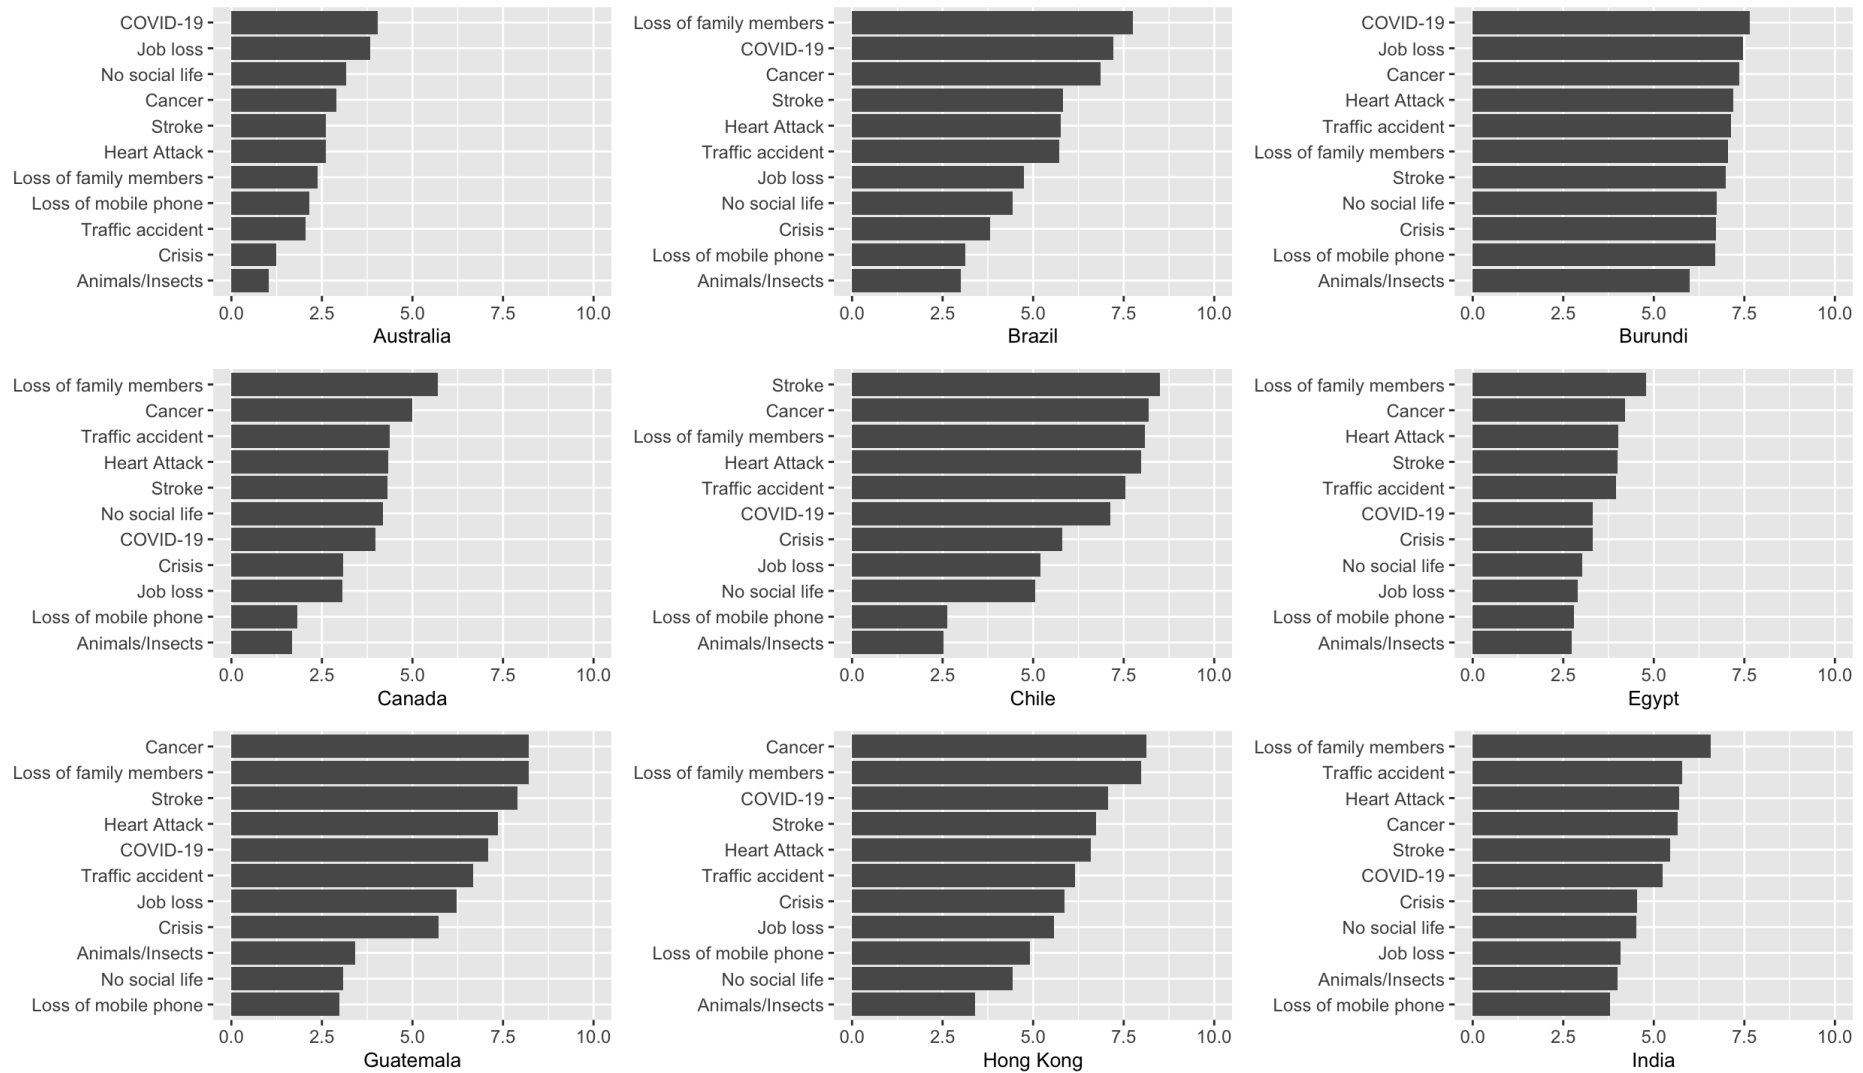

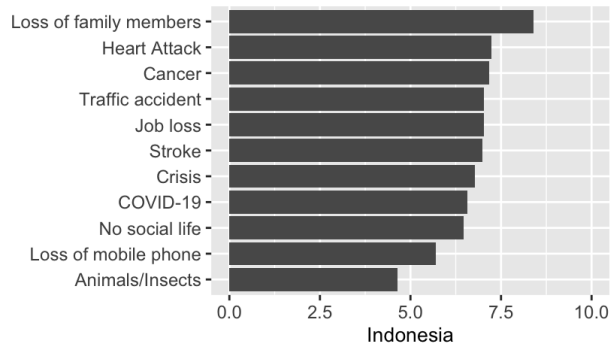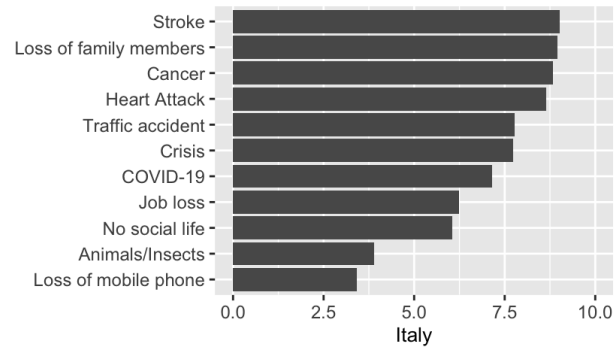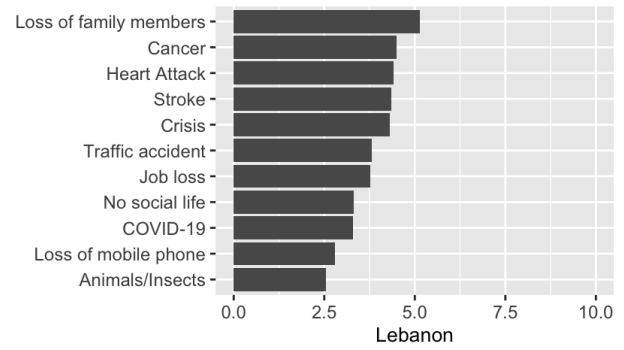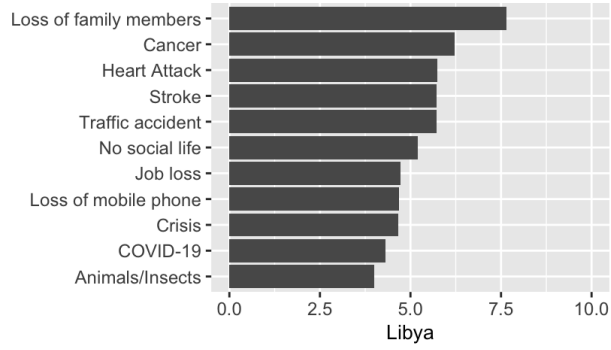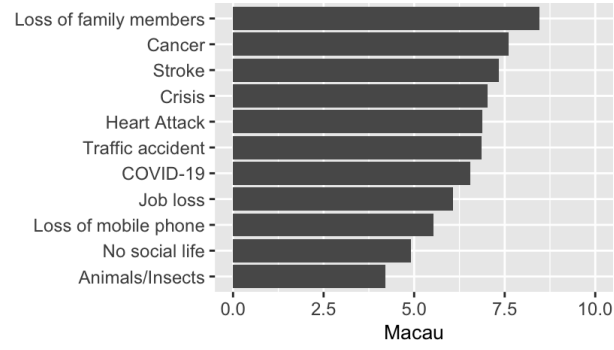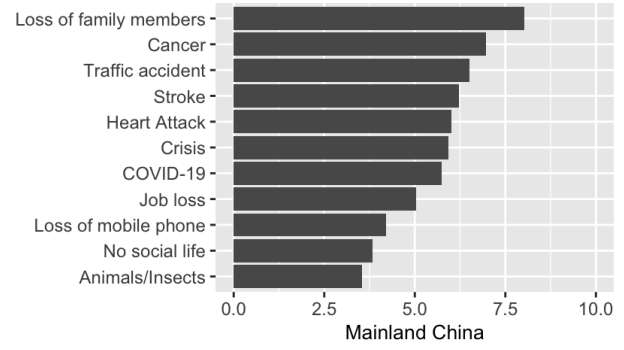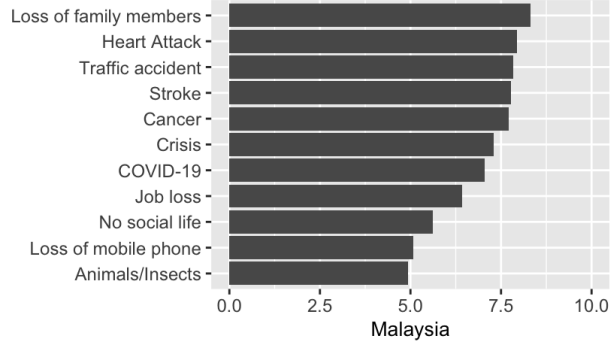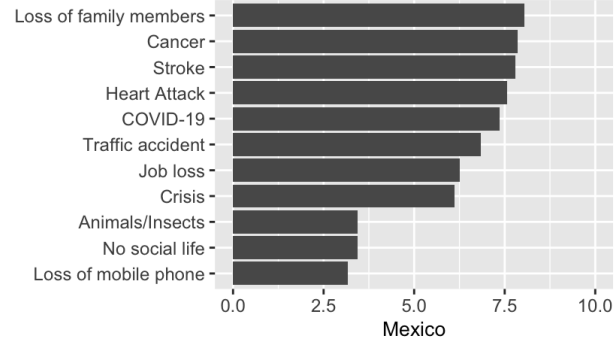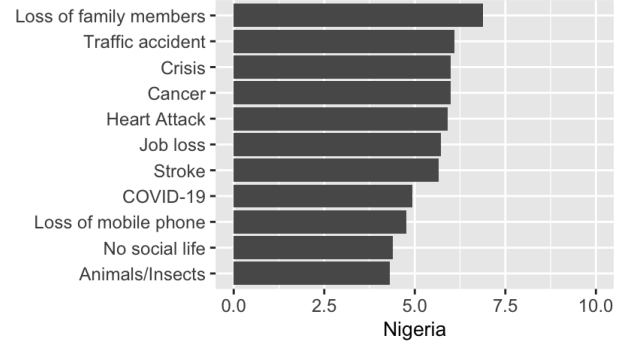

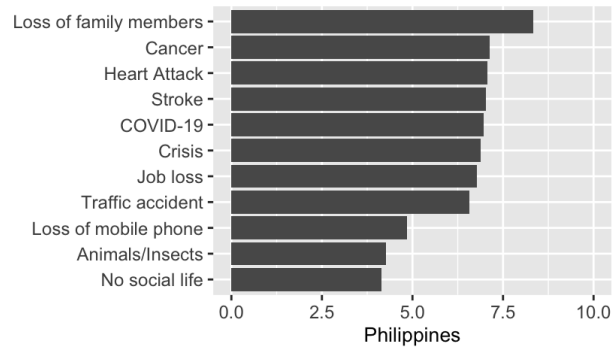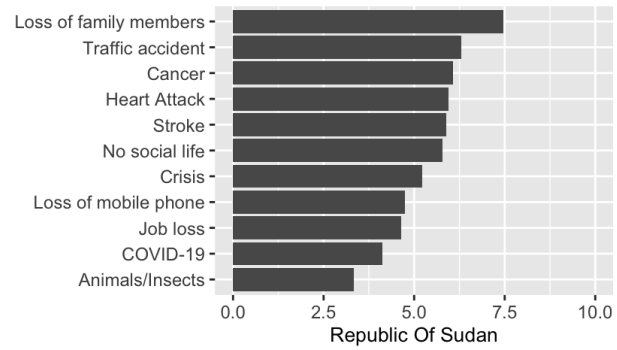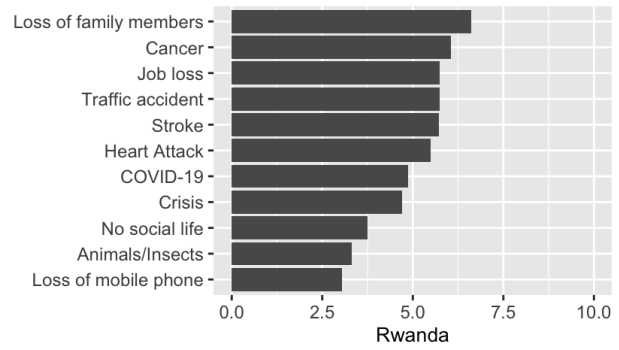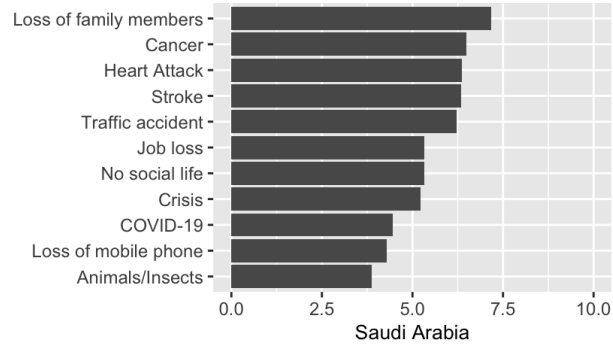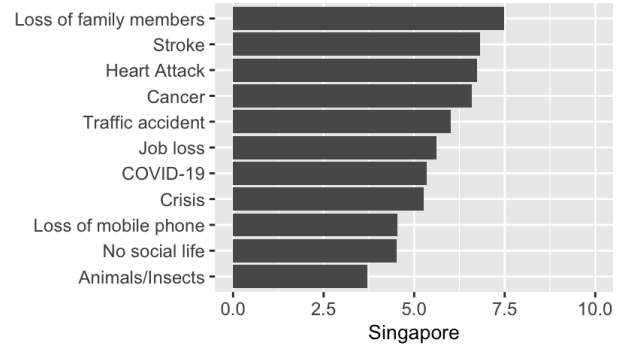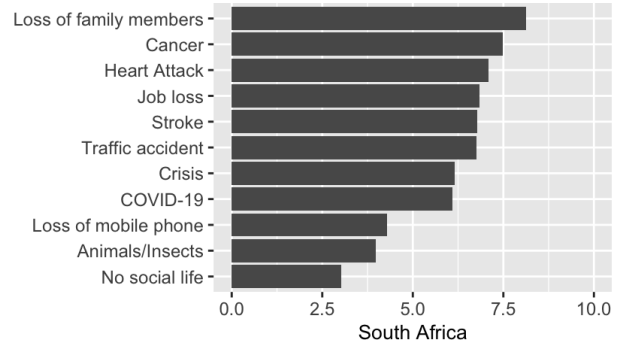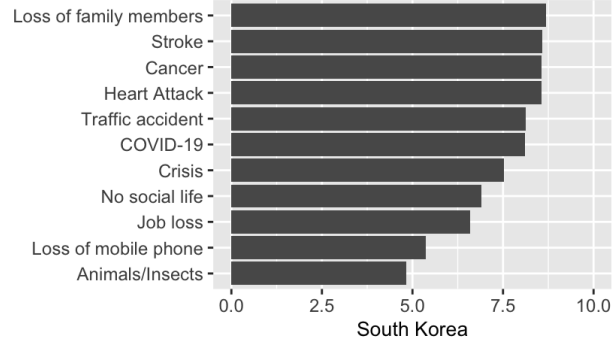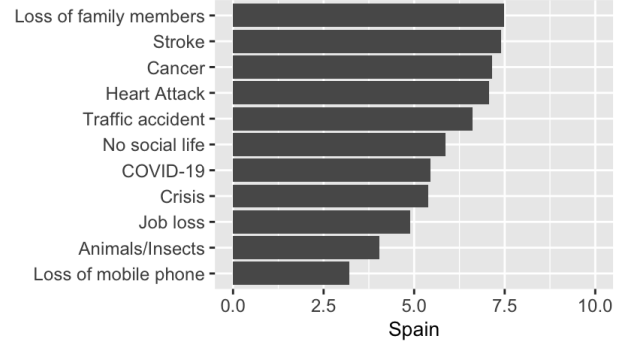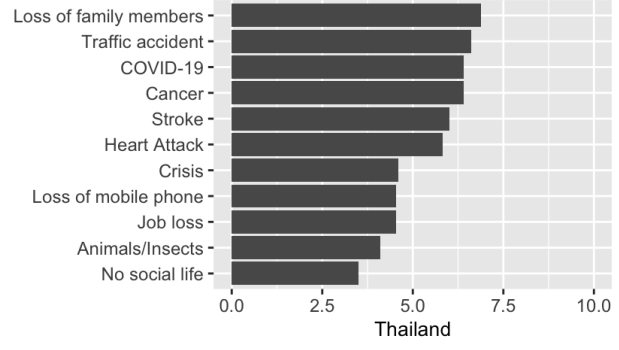

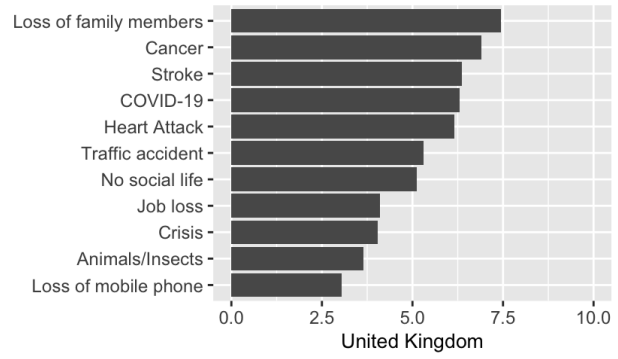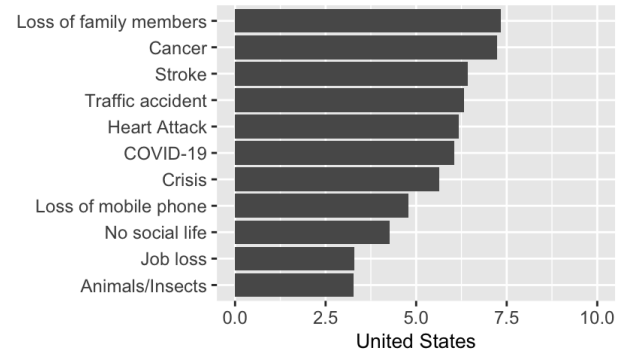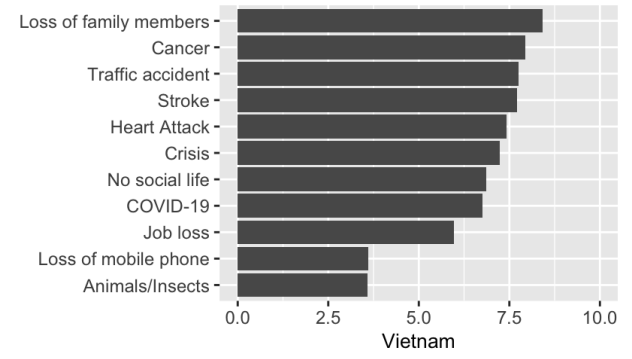



**b. Comparison of respondents' weighted mean of fear of 11 factors across countries.**

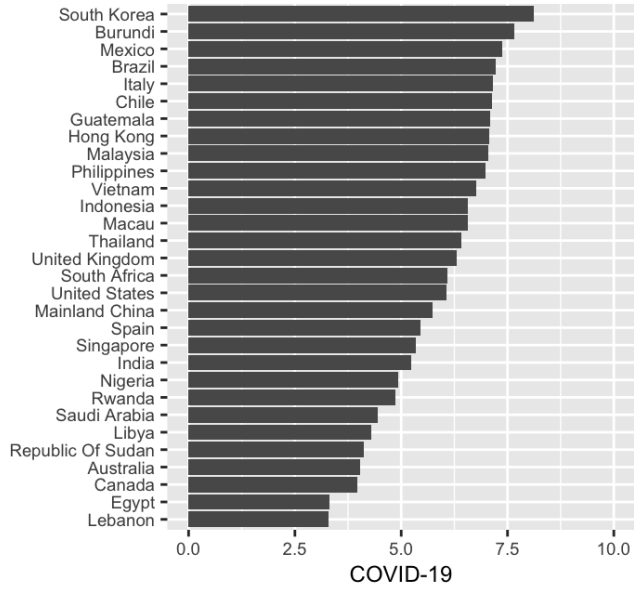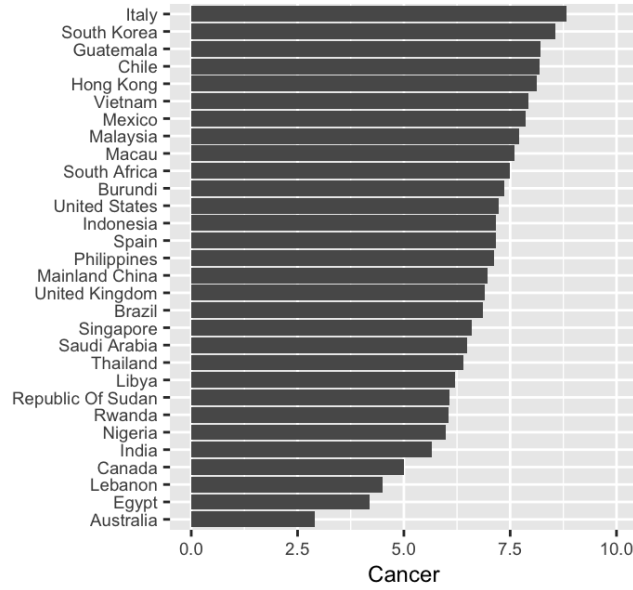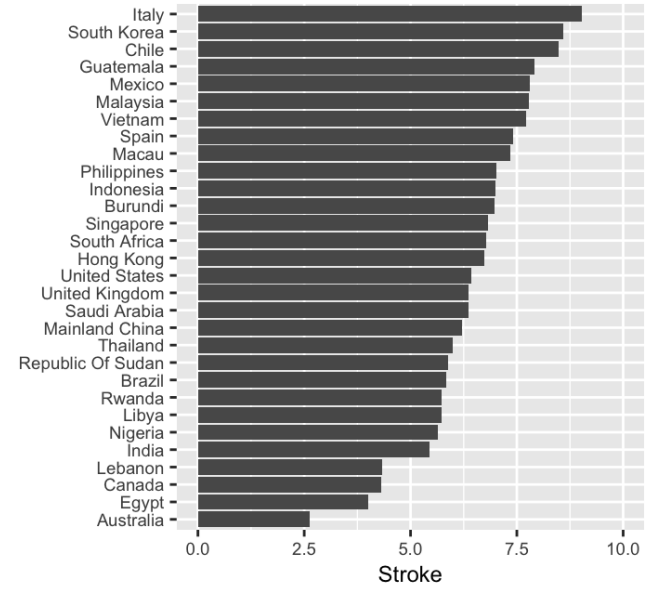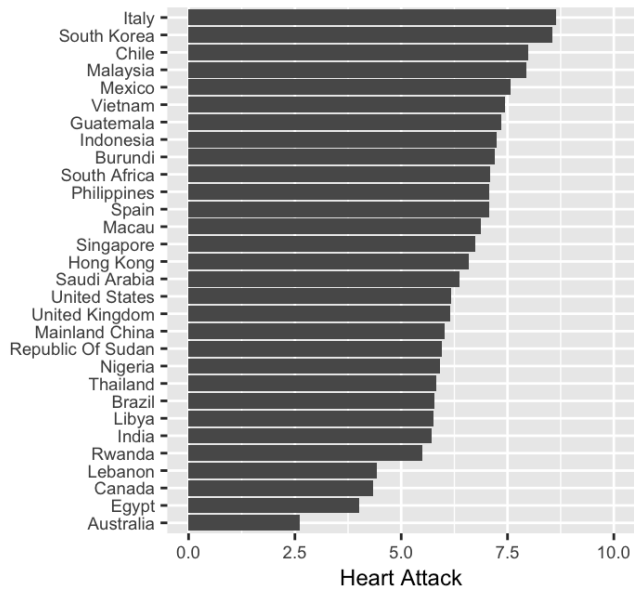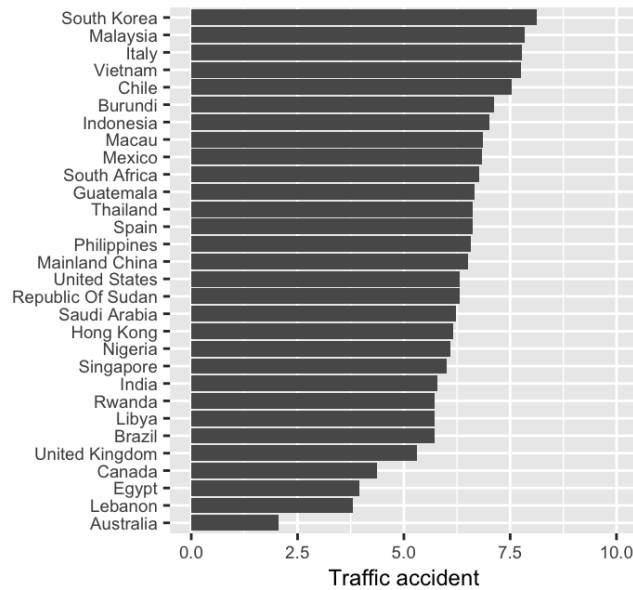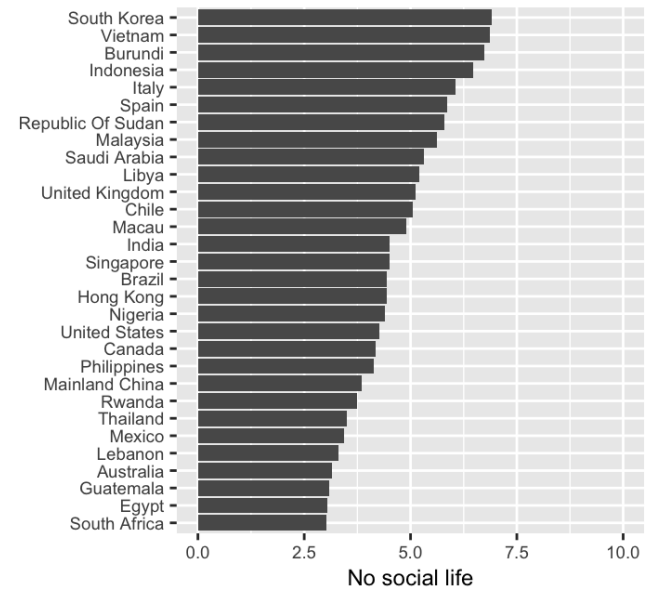



c. Weighted mean of fear of 11 factors by region.

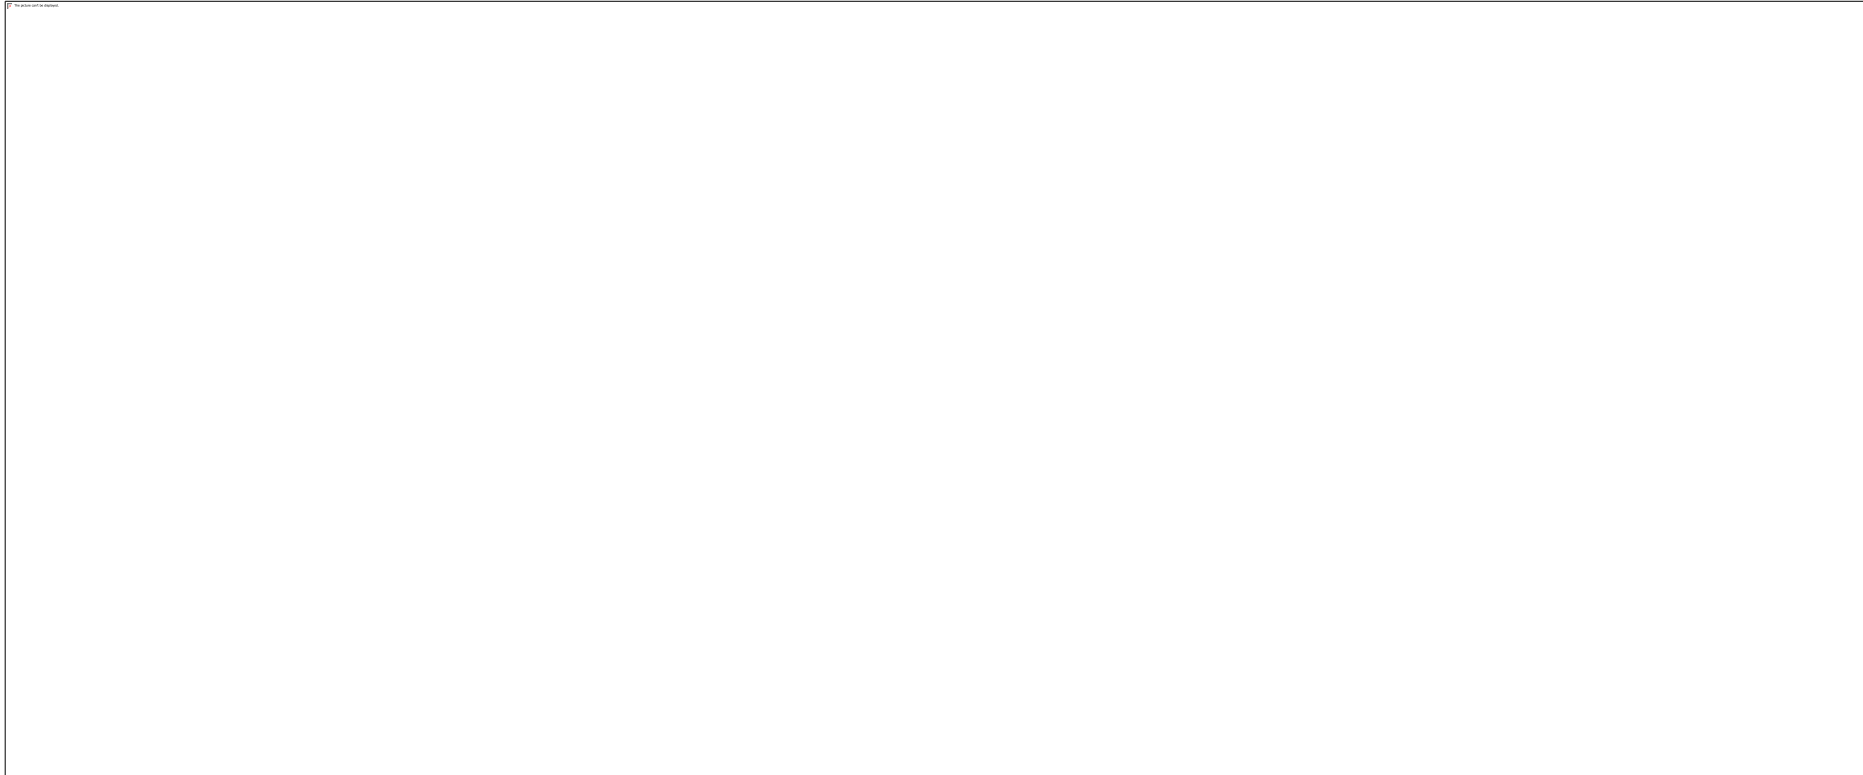

d. Weighted mean of fear of 11 factors by economic development level.

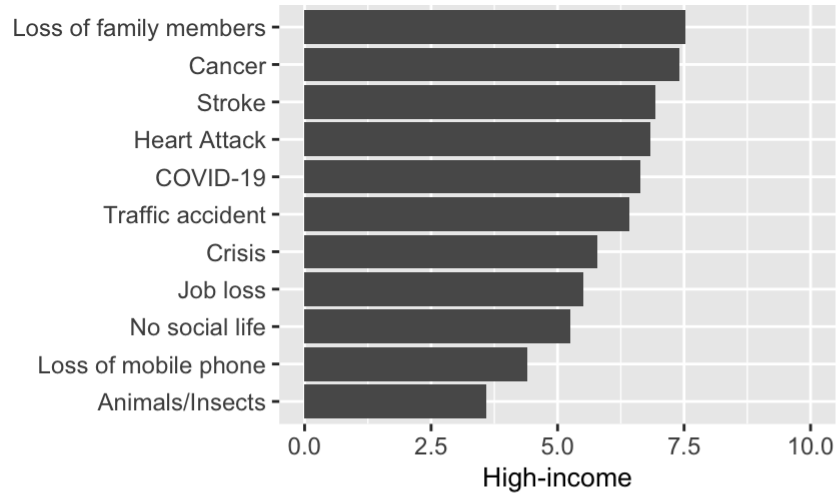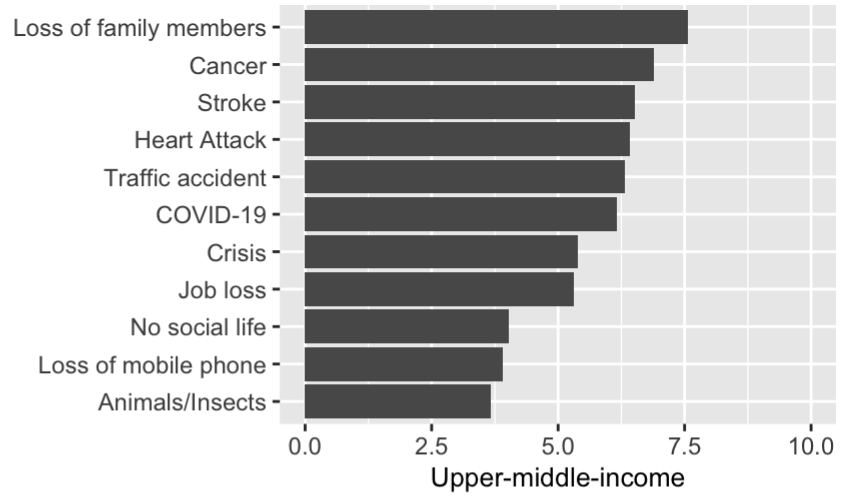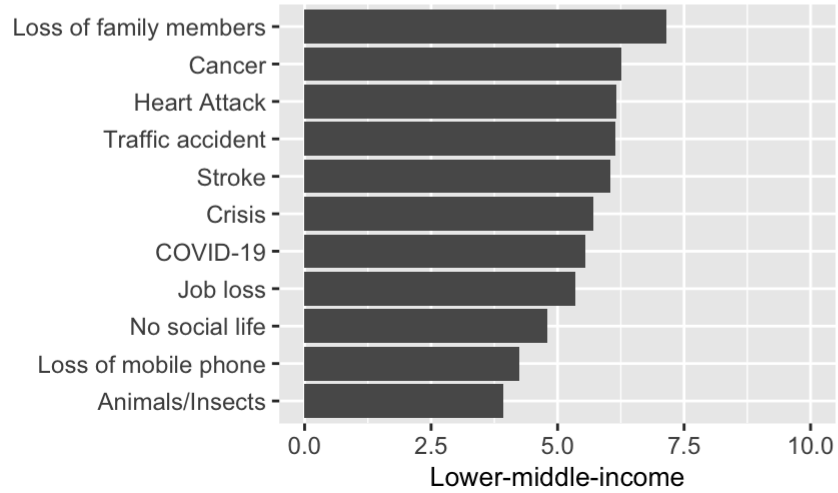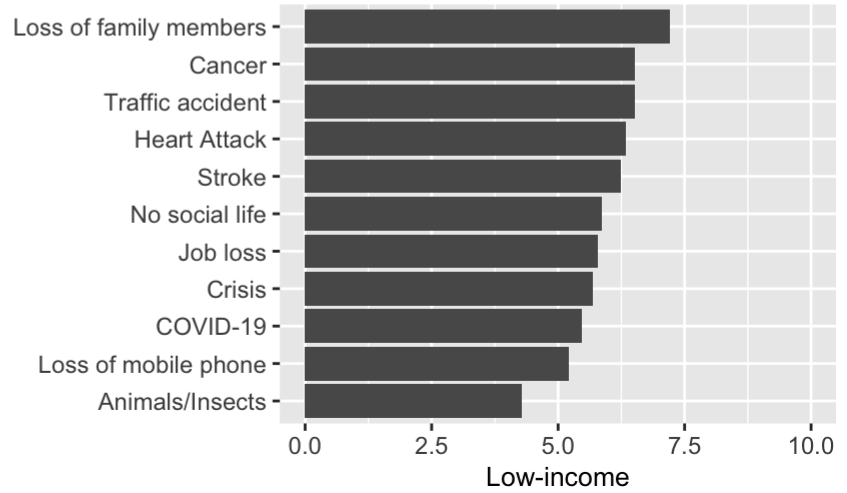

**e. Weighted mean of fear of factors by COVID-19 severity level.**

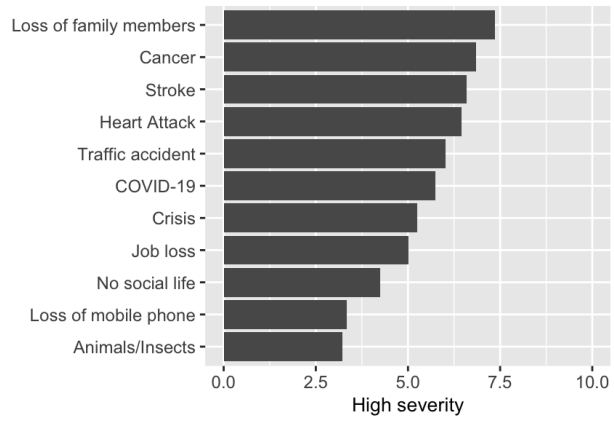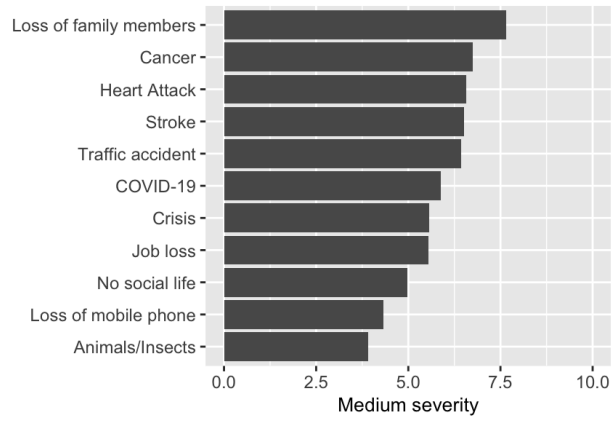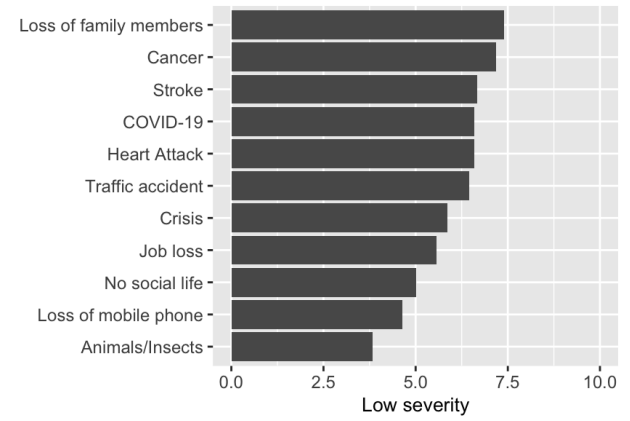

Supplement: jogh-14-05019-s001.pdf [file jogh-14-05019-s001.pdf]
